# Supplementary material
Source: PubMed Central journal article supplement (PMC5899449)
Supplement: pnas.1718382115.sapp.pdf [file pnas.1718382115.sapp.pdf]

1 Supporting information for

2 **Mechanistic insights into staphylopine-mediated metal acquisition**

3 Liqiang Song\*, Yifei Zhang\*, Weizhong Chen\*, Tongnian Gu\*, Shu-Yu Zhang<sup>†</sup>, and Quanjiang  
4 Ji\*<sup>‡</sup>

5 \*School of Physical Science and Technology, ShanghaiTech University, Shanghai 201210,  
6 China.

7 <sup>†</sup>School of Chemistry and Chemical Engineering, Shanghai Jiao Tong University, Shanghai  
8 200240, China.

9  
10 <sup>‡</sup>To whom correspondence should be addressed:

11 Quanjiang Ji

12 School of Physical Science and Technology, ShanghaiTech University

13 Shanghai 201210, China.

14 Email: [quanjiangji@shanghaitech.edu.cn](mailto:quanjiangji@shanghaitech.edu.cn)

15

16

17

18

19

20

21 **Supplementary procedures**

22 **Protein expression and purification.**

23 The *cntA* gene was PCR-amplified from *Staphylococcus aureus* Newman genomic DNA with the  
24 primers CntA-Fw/Rv (SI Appendix, Table S4). The PCR product was digested with *NdeI* and  
25 *XhoI* and further ligated into the *NdeI/XhoI* sites of a pET28a-modified vector containing the  
26 human rhinovirus 3C (HRV3C) protease cleavage site. The successful construction of the  
27 plasmid pET28a\_HRV3C\_CntA was confirmed by sequencing. The plasmid was transformed  
28 into *E.coli* BL21 (DE3) for protein expression. Cells were grown in LB to an OD<sub>600</sub> of ~0.6 at  
29 37 °C. Protein expression was induced by adding 0.5 mM IPTG to the growth media. The  
30 induced cells were further cultured overnight at 20 °C. The cells were harvested by  
31 centrifugation at 5000 g for 10 min.

32  
33 Cell pellets were resuspended in the lysis buffer (10 mM Tris HCl pH 7.4, 500 mM NaCl, 5%  
34 glycerol, 1mM DTT), and lysed by sonication. The 6XHis-tagged protein was trapped in a His-  
35 Trap HP column (GE Healthcare). The column was first washed with 20 mL lysis buffer and  
36 then eluted with a buffer containing 10 mM Tris HCl pH 7.4, 500 mM NaCl, 5% glycerol, 100  
37 mM imidazole, and 1mM DTT. The protein was buffer exchanged into the lysis buffer using a  
38 spin column (molecular-weight cutoff of 10 kDa, Merck Millipore). The 6XHis tag of the protein  
39 was cleaved by the HRV 3C protease (the mass ratio of CntA and HRV 3C protease is ~ 100:1)  
40 at 4 °C overnight. The protein was clarified and passed through a His-trap column to remove  
41 uncleaved CntA and the HRV 3C protease. The flow-through fraction was collected and further  
42 purified by using a HiLoad 16/600 Superdex 200 pg column (GE Healthcare) in the elution  
43 buffer (10 mM Tris·HCl pH 7.4, 100 mM NaCl). The eluted protein was concentrated to a

44 concentration of ~20 mg/mL (the concentration was determined by UV-Vis spectrometry; The  
45 extinction coefficient of CntA at 280 nm is ~ 57300 M<sup>-1</sup> cm<sup>-1</sup>).

46  
47 For site-specific mutagenesis of *cntA*, rolling-circle PCR (using the primers listed in Table S4)  
48 was performed by following the standard procedures of the QuickChange Site-Directed  
49 Mutagenesis Kit (Stratagene). The successful construction of the mutated plasmids was  
50 confirmed by sequencing. The mutant proteins were purified by using the same procedures as  
51 that of the wild-type protein.

52  
53 **Size-exclusion chromatography.**

54 The CntA wild-type and mutant proteins (after 6XHis tag cleavage) were subjected to size-  
55 exclusion chromatography analysis by using a HiLoad 16/600 Superdex 200 pg column (GE  
56 Healthcare) in the elution buffer (10 mM Tris·HCl pH 7.4, 100 mM NaCl) at a flow rate of 1  
57 mL/min with UV detection at 280 nm.

58  
59 **Protein crystallization.**

60 The first truncation of CntA we tried to crystallize is from Q35 to K532 (the amino acids are not  
61 renumbered). The design of the construct is based on protein sequence alignment with structure-  
62 solved solute-binding proteins. However, we could not obtain any crystal after screening 500  
63 conditions. We then performed a protein secondary structure analysis. We noticed that the CntA  
64 protein possesses an additional N-terminal helix (G26-N33 [the amino acids are not  
65 renumbered]) compared with structure-solved SBPs. We suspected that this helix may affect  
66 protein crystallization. After adding the N-terminal helix, the CntA protein was crystallized

67 successfully. The truncated region before the N-terminal helix is the lipophilic anchor.

68

69 The apo-CntA protein and CntA/StP/metal ( $\text{Co}^{2+}$ ,  $\text{Ni}^{2+}$ , and  $\text{Zn}^{2+}$ ) complexes were crystallized by  
70 using the sitting-drop, vapor-diffusion method at 16 °C. To obtain apo-CntA crystals, 1  $\mu\text{L}$   
71 protein solution (15 mg/ml in 10 mM Tris-HCl pH 7.4, 100 mM NaCl) was mixed with an equal  
72 volume of reservoir solution containing 0.1 M MES monohydrate pH 5.5, 25% (v/v)  
73 polyethylene glycol 400. For co-crystallization, CntA was incubated with metal-bound StP (the  
74 molar ratio of CntA and StP/  $\text{Ni}^{2+}$  is  $\sim 1:3$ ) before being mixed with the reservoir solution  
75 containing 0.1 M citric acid pH 3.5, 14% (w/v) polyethylene glycol 1000. The CntA/StP/ $\text{Co}^{2+}$   
76 and CntA/StP/ $\text{Zn}^{2+}$  complexes were crystallized under the condition containing 0.1 M BICINE  
77 pH 8.5, 8% w/v polyethylene glycol monomethyl ether 5000. The crystals were cryo-protected  
78 and stored in liquid  $\text{N}_2$  before data collection.

79

#### 80 **Data collection, structure determination, and refinement.**

81 The data were collected at BL18U1 and BL19U1 beamlines of National Facility for Protein  
82 Science Shanghai (NFPS) at Shanghai Synchrotron Radiation Facility. The data were processed  
83 by HKL3000 (1). The phase of apo-CntA was determined by Phaser (2) from ccp4i (3) suits  
84 using the structure of *Brucella suis* NikA (PDB code: 4OER) as the searching model. The phases  
85 of the CntA/StP/metal complexes were determined by Phaser using the structure of apo-CntA as  
86 the searching model. The models were built by Autobuild from PHENIX (4) suits. The model of  
87 CntA/StP/ $\text{Co}^{2+}$  was refined using phenix.refine from PHENIX (4) suits and the models of apo-  
88 CntA, CntA/StP/ $\text{Ni}^{2+}$  and CntA/StP/ $\text{Zn}^{2+}$  were refined using Refmac5 from ccp4i suits (using

89 TLS and restrained refinement for the model of apo-CntA). The models were further improved  
90 manually by coot (5). The final structures were visualized by Pymol (<http://www.pymol.org>).

91

### 92 **Isothermal titration calorimetry (ITC).**

93 Staphylopine (N-[3-(N-L-Alanyl)-amino-3-carboxypropyl]-D-histidine) and nicotianamine were  
94 ordered from Toronto Research Chemical Inc (Toronto, Canada). The binding constants were  
95 determined by using the MicroCal ITC200 system (Malvern). The wild-type CntA protein, the  
96 mutant proteins, and the ligands were prepared in the same buffer containing 10 mM Tris HCl,  
97 pH 7.4, 100 mM NaCl. The concentrations of the proteins and the ligands for the assay were 20  
98  $\mu$ M and 200  $\mu$ M, respectively. In the assay, the solutions of ligands in the syringe were slowly  
99 titrated into the reaction cell containing protein solutions. The assay was performed at 25 °C with  
100 a stirring speed of 750 rpm. The ligands were injected 20 times (0.4  $\mu$ l for injection 1 and 2  $\mu$ l  
101 for injections 2–20), with 180 s intervals between injections. The data were analyzed with the  
102 Origin7 software package (Malvern).

103

### 104 **Construction of *cntA* gene deletion and single-base substitution mutants of *S. aureus*.**

105 The *cntA* gene deletion and single-base substitution mutants were constructed by using the  
106 pCasSA system(6).

107

108 In brief, a 20-bp spacer sequence (before NGG PAM site), adjacent to the desired mutation site,  
109 was cloned into the pCasSA plasmid by Golden Gate assembly. When the desired mutation site  
110 is not present in the PAM sequence, a silent mutation was introduced in the PAM to prevent the  
111 cutting of Cas9/sgRNA complex in the genome of edited cells. To achieve this, we prepared the

112 repair arms by using a helper vector pSP72. A ~ 4 kb DNA sequence containing the entire *cntA*  
113 gene and the up and down regions of *cntA* was PCR amplified from the Newman genomic DNA.  
114 The desired mutation and the silent mutation (when necessary) were introduced into the repair  
115 arms by site-directed mutagenesis. The repair template containing the desired mutation and the  
116 silent mutation (when necessary) was PCR amplified from the pSP72\_cnt plasmid and  
117 subsequently cloned into the pCasSA\_spacer plasmid by Gibson assembly. The plasmid was first  
118 transformed into the RN4220 strain by electroporation. The successful editing in the RN4220  
119 strain was confirmed by sequencing. The plasmid was then isolated from the RN4220 strain that  
120 contained the desired mutation and transformed into the Newman strain by electroporation. The  
121 successful editing in the Newman strain was confirmed by sequencing. The *cntA* gene deletion  
122 mutants were obtained from the literature (6).

123

#### 124 ***cntA* gene complementation.**

125 The *cntA* gene and the cnt operon promoter were PCR amplified (Table S4) from the Newman  
126 genomic DNA. The PCR products were inserted into the *Bam*HI site of the chromosomal  
127 integration vector pCL55 (7) by Gibson assembly to generate the pCL\_*cntA* plasmid (the  
128 expression of *cntA* is driven by the cnt operon promoter). The pCL\_*cntA* plasmid and the empty  
129 pCL55 plasmid were first transformed into the *E. coli* ALC7885 (8) strain for restriction  
130 modification. The plasmids isolated from the ALC7885 strain were directly transformed into the  
131 *S. aureus* Newman strain by electroporation.

132

#### 133 **Growth curve measurements.**

134 Previous studies (9, 10) revealed that the phenotypes after StP-biosynthesis pathway disruption is  
135 most significant when cobalt was utilized for the experiments (growth curve and metal-content  
136 measurements). To better assess the role of each StP/metal-binding residues, we utilized cobalt  
137 for the experiments. The growth of *S. aureus* strains was monitored using the automated microbe  
138 growth curve analysis system BioScreen C (OY Growth Curves Ltd, Finland). Overnight  
139 cultures were 1:100 diluted into 200  $\mu$ L CDM (When indicated, the cultures were supplemented  
140 with 1.5 mM  $\text{CoCl}_2$ ) and then transferred to the Bioscreen micro-well plates. The plates were  
141 incubated at 37  $^\circ\text{C}$  with continuous shaking inside the machine. The optical density (OD) at 600  
142 nm was measured every 30 min. All the experiments were performed in triplicate.

143

#### 144 **Metal-content measurement using ICP-AES.**

145 The samples were prepared according to procedures described in the literatures (9, 10). In brief,  
146 10 ml cultures of *S. aureus* strains were grown at 37  $^\circ\text{C}$  in CDM (supplemented with 1 $\mu$ M  $\text{CoCl}_2$ )  
147 until late exponential phase ( $\text{OD}_{600} \sim 1.5\text{-}2.5$ ). Cultures were harvested by centrifugation at 6,000  
148 g at 4  $^\circ\text{C}$  for 10 min. Pellets were washed three times with 1 mL 1 mM EDTA solution (ice-cold)  
149 followed by a wash with 1mL MilliQ  $\text{H}_2\text{O}$ . Cells were dried overnight at 100  $^\circ\text{C}$  and then  
150 digested by 500  $\mu$ L nitric acid (Suprapur 66~68 %  $\text{HNO}_3$ ; Sinopharm Chemical Reagent Co., Ltd)  
151 for 12 hr at 80  $^\circ\text{C}$ . The samples were diluted by adding MilliQ  $\text{H}_2\text{O}$  to final volumes of 5 mL.  
152 The element measurements were performed with Inductively Coupled Plasma-Absorption  
153 Emission Spectrometer (iCAP 7000 Plus Series, Thermo Scientific<sup>TM</sup>). Concentrations were  
154 determined by using standard solutions. The concentration of each metal element was calculated  
155 assuming  $4 \times 10^8$  cfu for an  $\text{OD}_{600}$  of 1 unit. The experiments were performed in triplicate.

156

157 **Competitive binding assay and metal analysis**

158 StP was incubated with a metal cocktail ( $\text{Co}^{2+}$ ,  $\text{Ni}^{2+}$ , and  $\text{Zn}^{2+}$ ) for 10 minutes before being added  
159 into the 6XHis-tag cleaved CntA protein solution. The reaction was performed in the 1 mL  
160 buffer containing 10 mM Tris HCl, pH 7.5. 560 nmol of StP, 140 nmol of each metal ( $\text{Co}^{2+}$ ,  $\text{Ni}^{2+}$ ,  
161 and  $\text{Zn}^{2+}$ ), and 70 nmol of CntA were used in the reaction. Unbounded StP/metal was removed  
162 by using a desalting separation (HiTrap column, GE Healthcare). The eluted CntA/StP/metal  
163 complexes were collected and lyophilized overnight. The powders were digested by 500  $\mu\text{L}$   
164 nitric acid (Suprapur 66~68 %  $\text{HNO}_3$ ; Sinopharm Chemical Reagent Co., Ltd) for 24 hr at 60  $^\circ\text{C}$ .  
165 The samples were diluted by adding MilliQ  $\text{H}_2\text{O}$  to final volumes of 6 mL prior to metal-content  
166 determination by ICP-AES. The experiments were performed in triplicate.

167

168

169

170

171

172

173

174

175

176

177



178 **Table S1.** Data collection, phasing, and refinement statistics.

|                                          | CntA (apo form)<br>(5YH5)   | CntA/Staphylopine/<br>Ni <sup>2+</sup> (5YH8) | CntA/Staphylopine/<br>Co <sup>2+</sup> (5YHE) | CntA/Staphylopine/<br>Zn <sup>2+</sup> (5YHG) |
|------------------------------------------|-----------------------------|-----------------------------------------------|-----------------------------------------------|-----------------------------------------------|
| Wavelength (Å)                           | 0.9778                      | 0.9785                                        | 0.9778                                        | 0.9778                                        |
| Beamline <sup>a</sup>                    | BL18U1                      | BL19U1                                        | BL18U1                                        | BL18U1                                        |
| Space group                              | P6 <sub>1</sub>             | P22 <sub>1</sub> 2 <sub>1</sub>               | P1                                            | P2 <sub>1</sub> 2 <sub>1</sub> 2              |
| Cell dimensions                          |                             |                                               |                                               |                                               |
| a, b, c (Å)                              | 149.395, 149.395,<br>53.635 | 70.782, 85.474,<br>86.315                     | 42.605, 76.659,<br>85.673                     | 86.07, 156.349,<br>42.257                     |
| α, β, γ (°)                              | 90.00, 90.00,<br>120.00     | 90.00, 90.00, 90.00                           | 90.683, 91.251,<br>104.568                    | 90.00, 90.00, 90.00                           |
| Resolution (Å)                           | 50.00-2.90                  | 50.00-2.12                                    | 50.00-2.47                                    | 50.00-2.03                                    |
| R <sub>merge</sub> (%)                   | 23.2 (177.7) <sup>b</sup>   | 14.1(83.8)                                    | 9.6 (43.9)                                    | 9.3 (48.8)                                    |
| I/σI                                     | 16.7 (2.0)                  | 16.1 (2.0)                                    | 11.1 (2.0)                                    | 24.9 (2.3)                                    |
| Completeness (%)                         | 100.0 (100.0)               | 99.9 (99.9)                                   | 98.0 (97.4)                                   | 99.7 (96.8)                                   |
| Redundancy                               | 20.1 (19.9)                 | 12.7(9.8)                                     | 3.5 (3.6)                                     | 12.1(9.8)                                     |
| <b>Refinement</b>                        |                             |                                               |                                               |                                               |
| Resolution (Å)                           | 49.55-2.90                  | 42.74-2.12                                    | 36.78-2.47                                    | 44.58-2.03                                    |
| Reflections (#)                          | 15367                       | 30251                                         | 37030                                         | 37675                                         |
| R <sub>work</sub> /R <sub>free</sub> (%) | 19.8/26.8                   | 15.6/22.9                                     | 16.1/23.5                                     | 15.9/21.3                                     |
| Number of nonhydrogen Atoms (#)          |                             |                                               |                                               |                                               |
| Protein                                  | 4008                        | 4064                                          | 8069                                          | 4039                                          |
| Staphylopine/metal                       | /                           | 24                                            | 48                                            | 24                                            |
| Rmsds                                    |                             |                                               |                                               |                                               |
| Bond lengths (Å)                         | 0.017                       | 0.015                                         | 0.008                                         | 0.018                                         |
| Bond angle (°)                           | 2.01                        | 1.82                                          | 1.00                                          | 1.91                                          |
| Average B factors (Å <sup>2</sup> )      |                             |                                               |                                               |                                               |
| Overall                                  | 86.94                       | 35.20                                         | 38.99                                         | 45.50                                         |
| Protein                                  | 86.94                       | 34.60                                         | 39.07                                         | 45.04                                         |
| Staphylopine/metal                       | /                           | 22.68                                         | 29.87                                         | 37.42                                         |

179 <sup>a</sup>Crystal data were collected at the beamlines of National Facility for Protein Science Shanghai (NFPS) at Shanghai Synchrotron  
180 Radiation Facility.

181 <sup>b</sup>Statistics for the highest-resolution shell are shown in parentheses.

182

183

184

185

186

187

188

189

190 **Fig. S1.** Sequence alignment of CntA, *Ec*NikA, *Cj*NikZ, and *Bs*NikA. The structural alignment  
 191 was performed by ESPrnt online software (<http://esprnt.ibcp.fr/ESPrnt/cgi-bin/ESPrnt.cgi>).  
 192 The StP/metal-recognition residues were indicated.

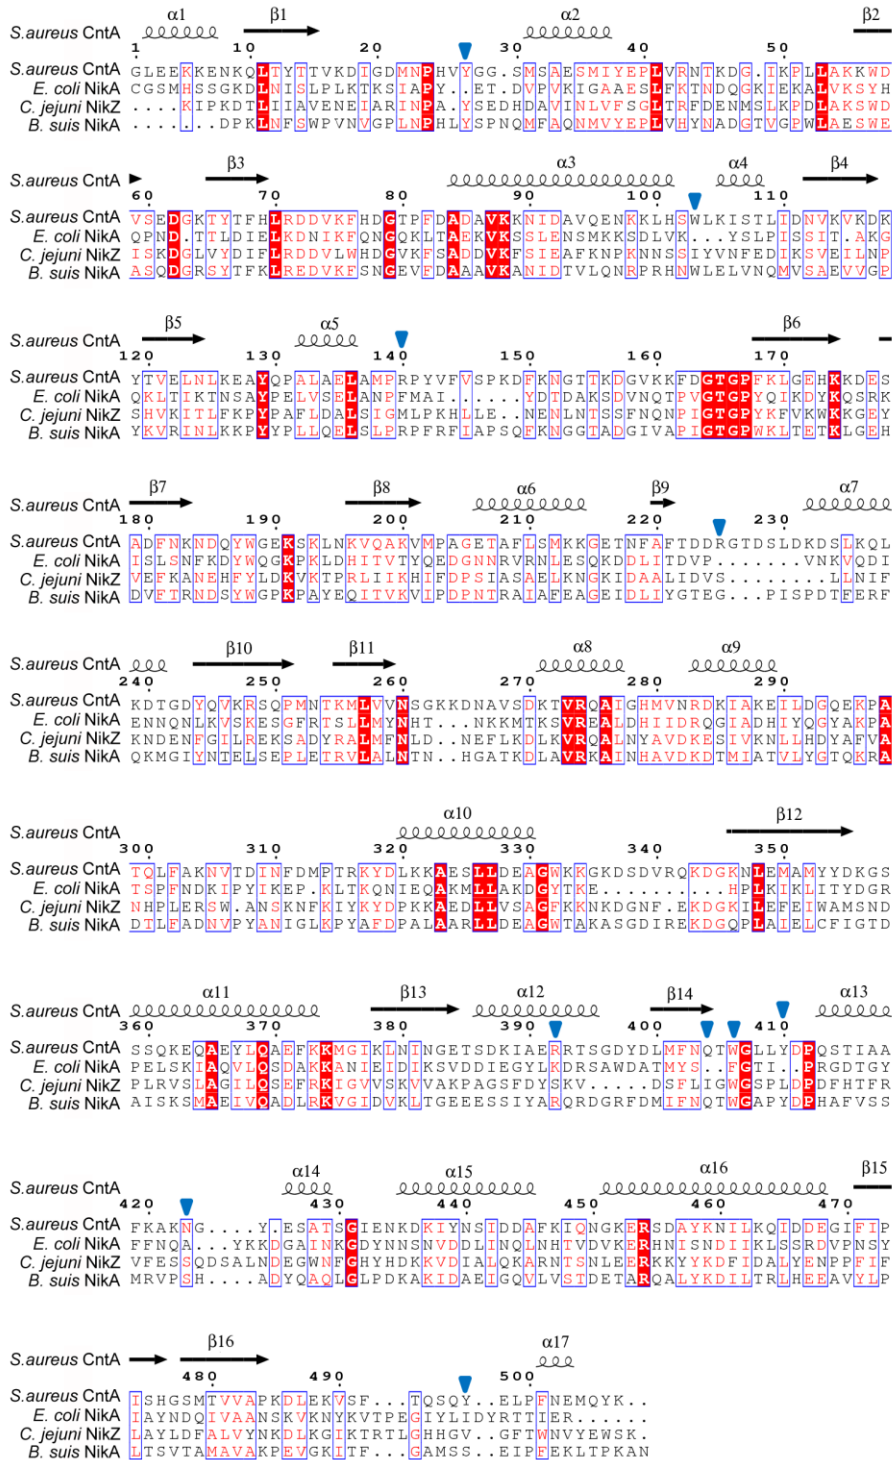

193

194 **Fig. S2.** Schematic representation of the topology of apo-CntA. The assignment of the secondary  
195 structure was based on the tertiary structure of apo-CntA visualized by Pymol.

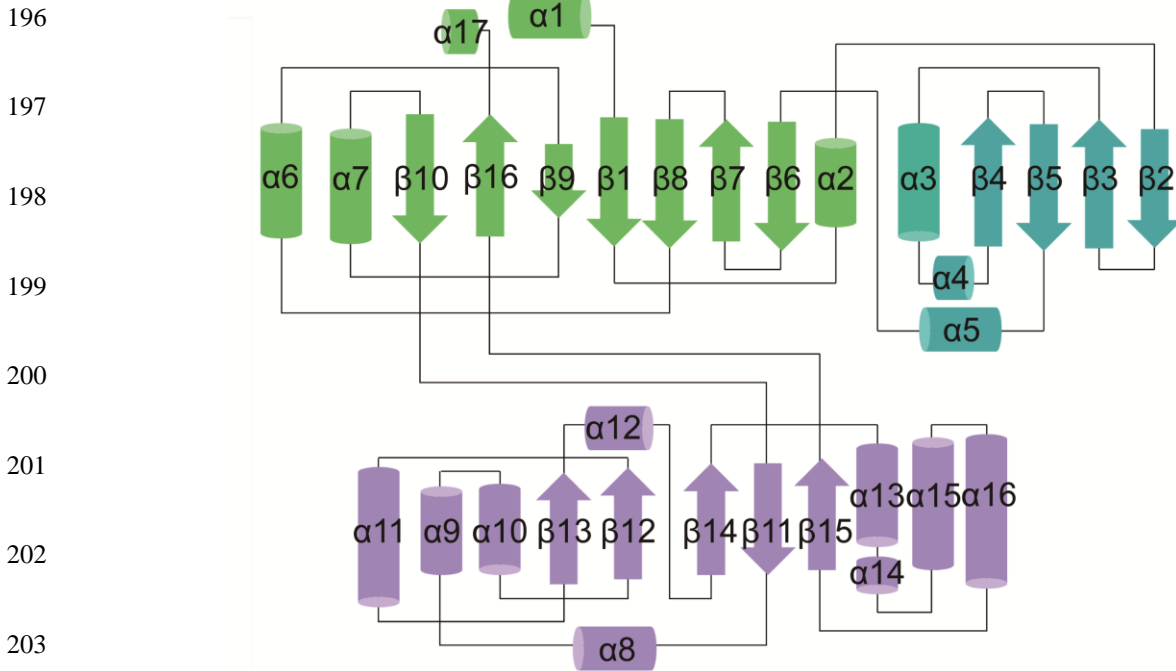

204

205

206

207

208

209

210

211

212

213

214 **Fig. S3.** Both StP and metals are indispensable for CntA binding. (A) ITC assay for the binding  
 215 between CntA and StP/Ni<sup>2+</sup>.  $K_d$ : the dissociation constant; N: the number of binding sites per  
 216 CntA. (B) ITC assay for the binding between CntA and StP/Zn<sup>2+</sup>.  $K_d$ : the dissociation constant; N:  
 217 the number of binding sites per CntA. (C) ITC assay for the binding between CntA and StP. (D)  
 218 ITC assays for the binding between CntA and different metals.

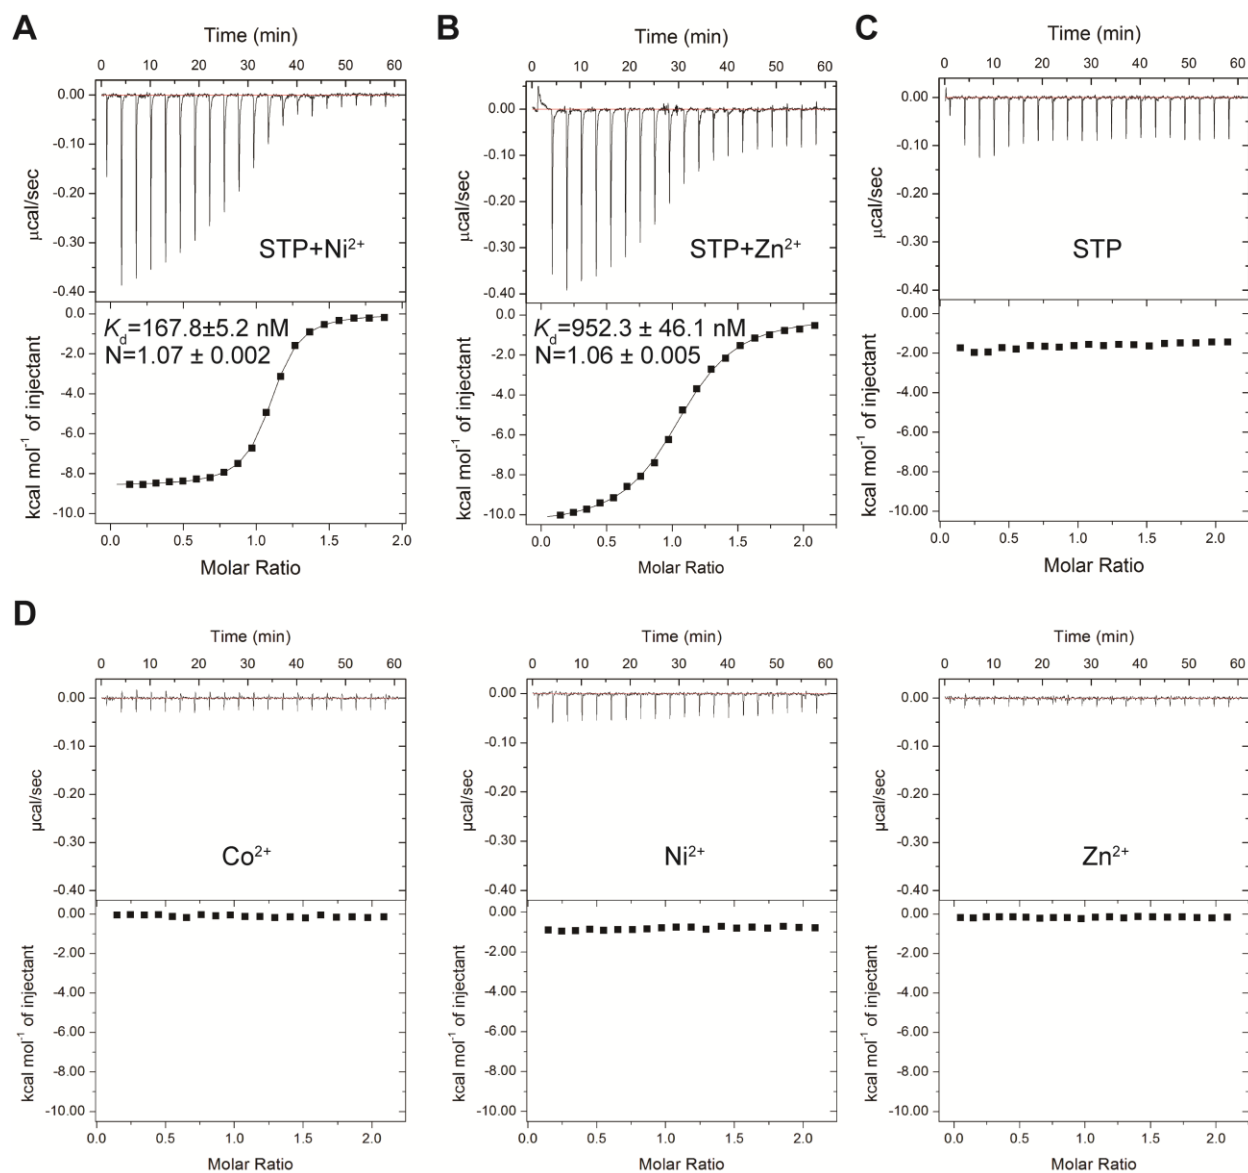

219

220

221 **Fig. S4.** A competitive binding assay indicates CntA binds StP/Ni<sup>2+</sup> and StP/Co<sup>2+</sup> tighter than  
222 StP/Zn<sup>2+</sup>. The assay was performed by incubating 70 μM CntA with 560 μM StP and a metal  
223 mixture containing 140 μM Zn<sup>2+</sup>, 140 μM Ni<sup>2+</sup>, and 140 μM Co<sup>2+</sup>. Unbounded StP/metal was  
224 removed by desalting. The metal content in CntA was determined by ICP-AES. The experiment  
225 was performed in triplicate.

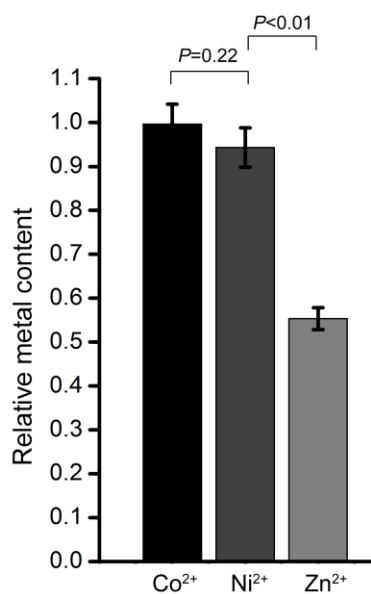

233  
234  
235  
236  
237  
238  
239  
240

241 **Fig. S5.** Structural characterizations of the CntA/StP/Ni<sup>2+</sup> complex and the CntA/StP/Zn<sup>2+</sup>  
242 complex. (A) The overall structure of the CntA/StP/Ni<sup>2+</sup> complex. StP is colored yellow. (B) The  
243 surface structure of the CntA/StP/Ni<sup>2+</sup> complex. (C) The overall structure of the CntA/StP/Zn<sup>2+</sup>  
244 complex. StP is colored yellow. (D) The surface structure of the CntA/StP/Zn<sup>2+</sup> complex.

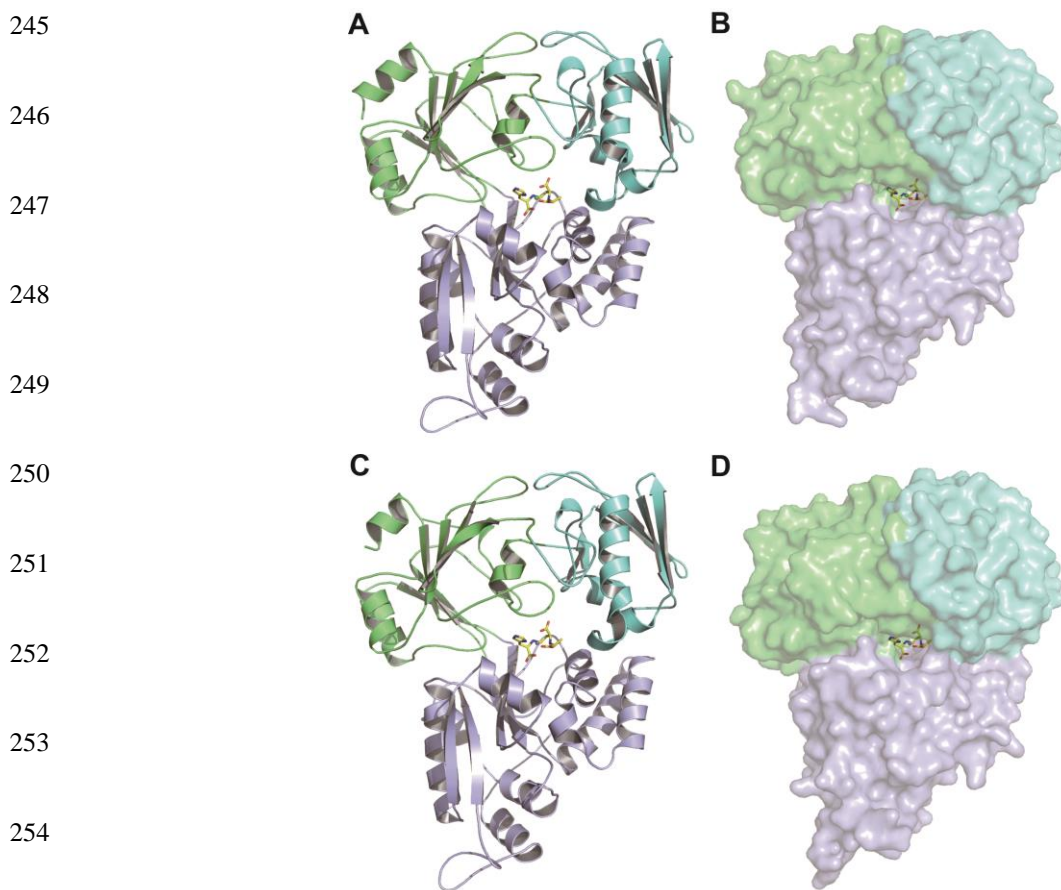

260 **Fig. S6.** Electron density maps of StP/Co<sup>2+</sup>, StP/Ni<sup>2+</sup>, and StP/Zn<sup>2+</sup>. (A) Detailed view of the  
261 electron density of Co<sup>2+</sup>.  $2F_o-F_c$  map (6.0  $\sigma$ ) is shown as a blue mesh. (B) Detailed view of the  
262 electron density of StP/Ni<sup>2+</sup>.  $2F_o-F_c$  map (1.0  $\sigma$ ) of StP/Ni<sup>2+</sup> and  $2F_o-F_c$  map (6.0  $\sigma$ ) of Ni<sup>2+</sup> are  
263 shown as blue meshes. (C) Detailed view of the electron density of StP/Zn<sup>2+</sup>.  $2F_o-F_c$  map (1.0  $\sigma$ )  
264 of StP/Zn<sup>2+</sup> and  $2F_o-F_c$  map (6.0  $\sigma$ ) of Zn<sup>2+</sup> are shown as a blue mesh.

265

266

267

268

269

270

271

272

273

274

275

276

277

278

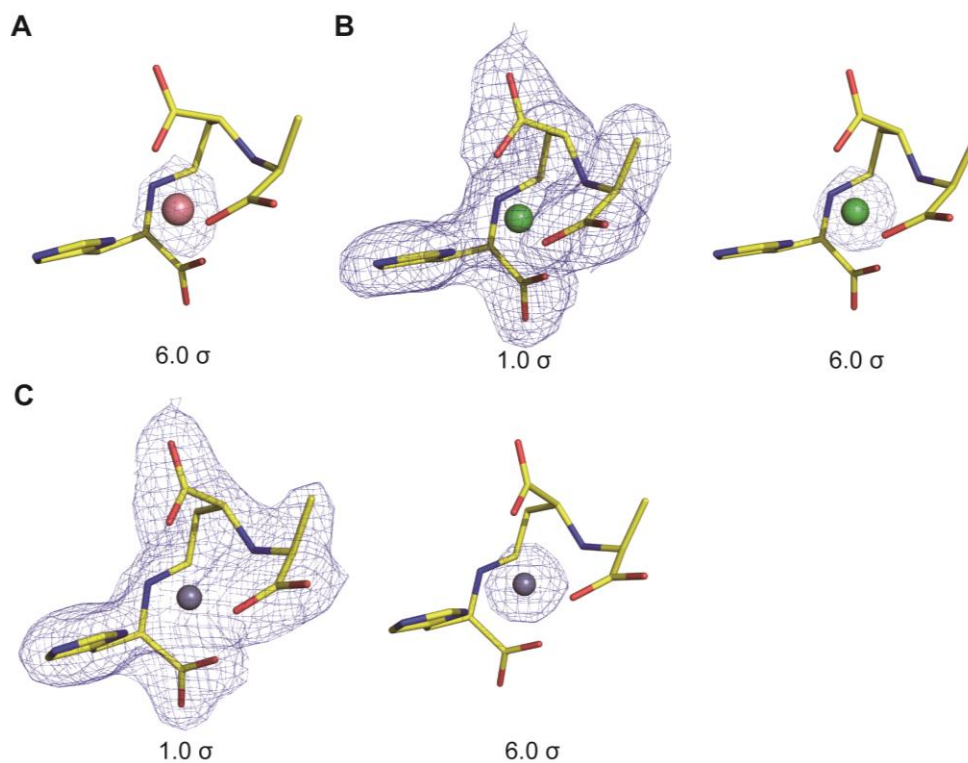

279 **Fig. S7.** The structures of three CntA/StP/metal complexes exhibit almost identical overall  
280 conformation. (A) Structural comparison of the CntA/StP/Co<sup>2+</sup> complex and the CntA/StP/Ni<sup>2+</sup>  
281 complex by superimposing C $\alpha$  atoms in overall molecule. The proteins of the CntA/StP/Co<sup>2+</sup>  
282 complex and the CntA/StP/Ni<sup>2+</sup> complex are colored gray and green, respectively. (B) Structural  
283 comparison of the CntA/StP/Co<sup>2+</sup> complex and the CntA/StP/Zn<sup>2+</sup> complex by superimposing  
284 C $\alpha$  atoms in overall molecule. The proteins of the CntA/StP/Co<sup>2+</sup> complex and the  
285 CntA/StP/Zn<sup>2+</sup> complex are colored gray and cyan, respectively.

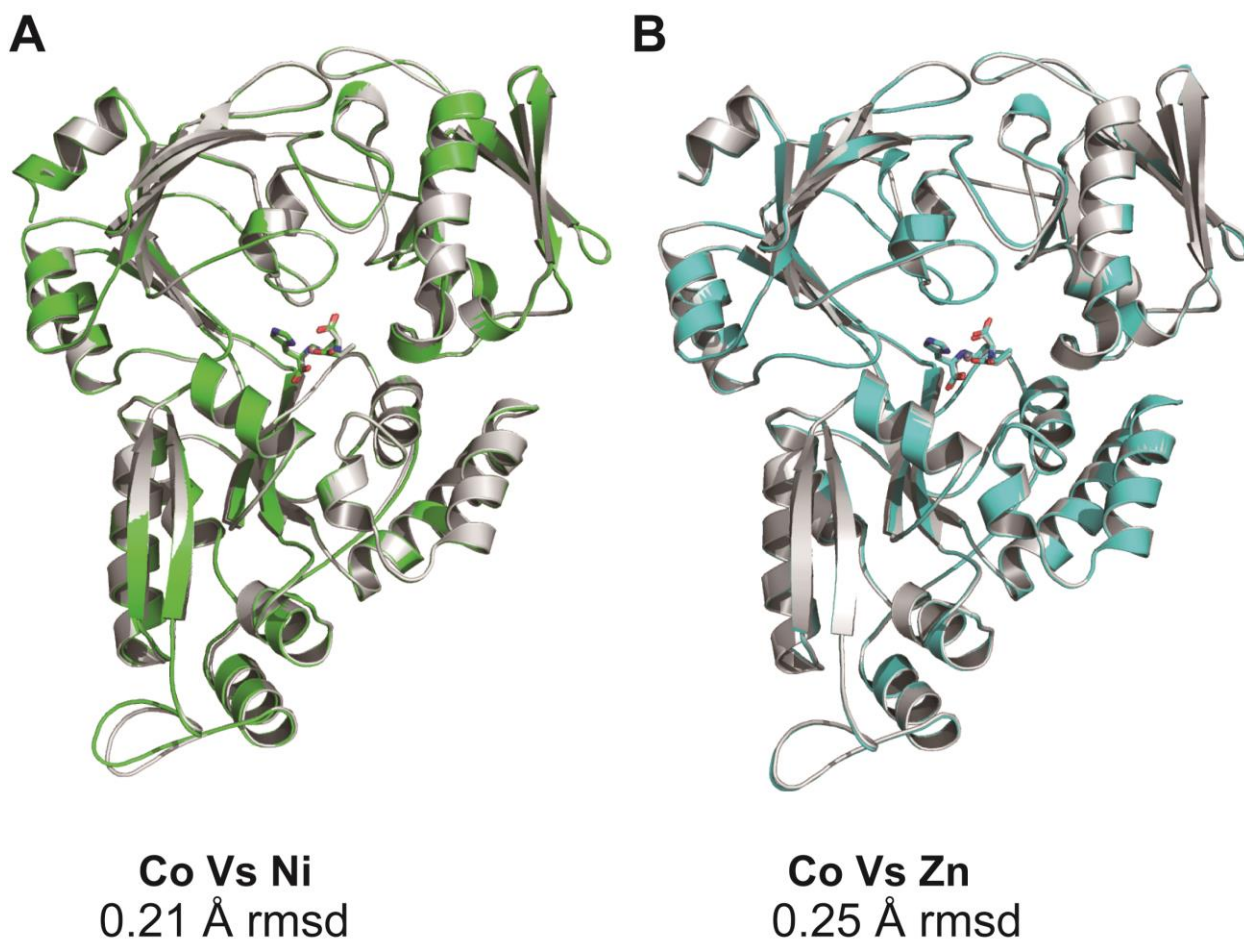

286

287

288



289 **Fig. S8.** The binding between CntA and StP/metal is specific and selective. (A) ITC assay  
290 between CntA and EDTA/Co<sup>2+</sup>. (B) ITC assay between CntA and nicotianamine/Co<sup>2+</sup>.

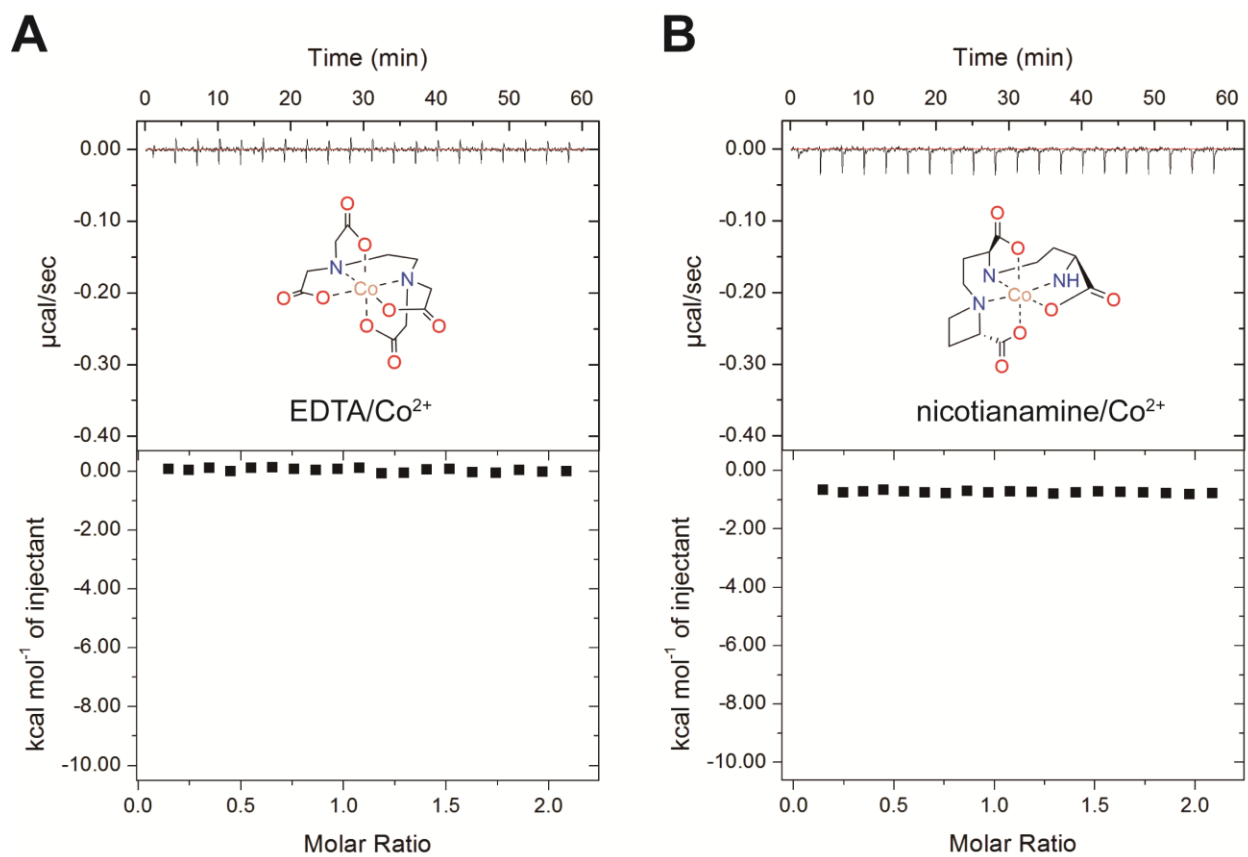

291

292

293

294

295

296

297

298

299 **Fig. S9.** Structural comparison of the CntA/StP/Co<sup>2+</sup> complex and apo-CntA by superimposing  
300 C $\alpha$  atoms in domains I<sub>a</sub> and I<sub>b</sub>. The domain II is viewed as cartoon and the domains I<sub>a</sub> and I<sub>b</sub> are  
301 viewed as ribbon. CntA/StP/Co<sup>2+</sup> and apo-CntA are colored cyan and salmon, respectively.

Superimposed by C $\alpha$  in the top domains (I<sub>a</sub>+I<sub>b</sub>)

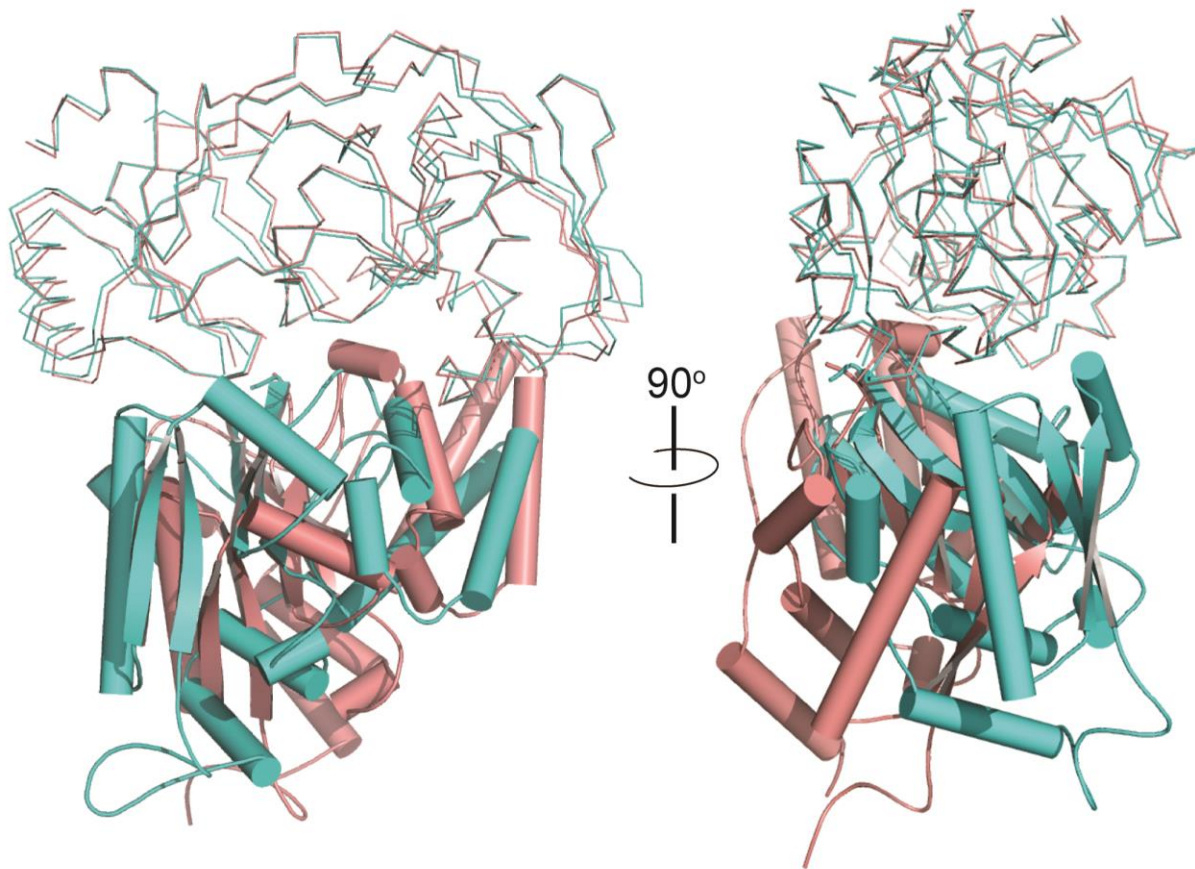

302

303

304

305

306

307

308

309 **Fig. S10.** Ligand binding induces inter-domain conformational change in metal-transportation  
310 SBPs. (A) Structural comparison between the apo structure of *Brucella suis* NikA (PDB: 4OER)  
311 and the *Bs*NikA/EDTA/Fe complex (PDB: 4OES). The apo and the complex structures are  
312 colored salmon and cyan, respectively. (B) Structural comparison between the apo structure of  
313 *Yersinia pestis* YntA (PDB: 4OFO) and the *Yp*YntA/L-histidine/Ni complex (PDB: 4OFL). The  
314 apo and the complex structures are colored salmon and cyan, respectively. The black arrows  
315 represent the directions that each domain moves.

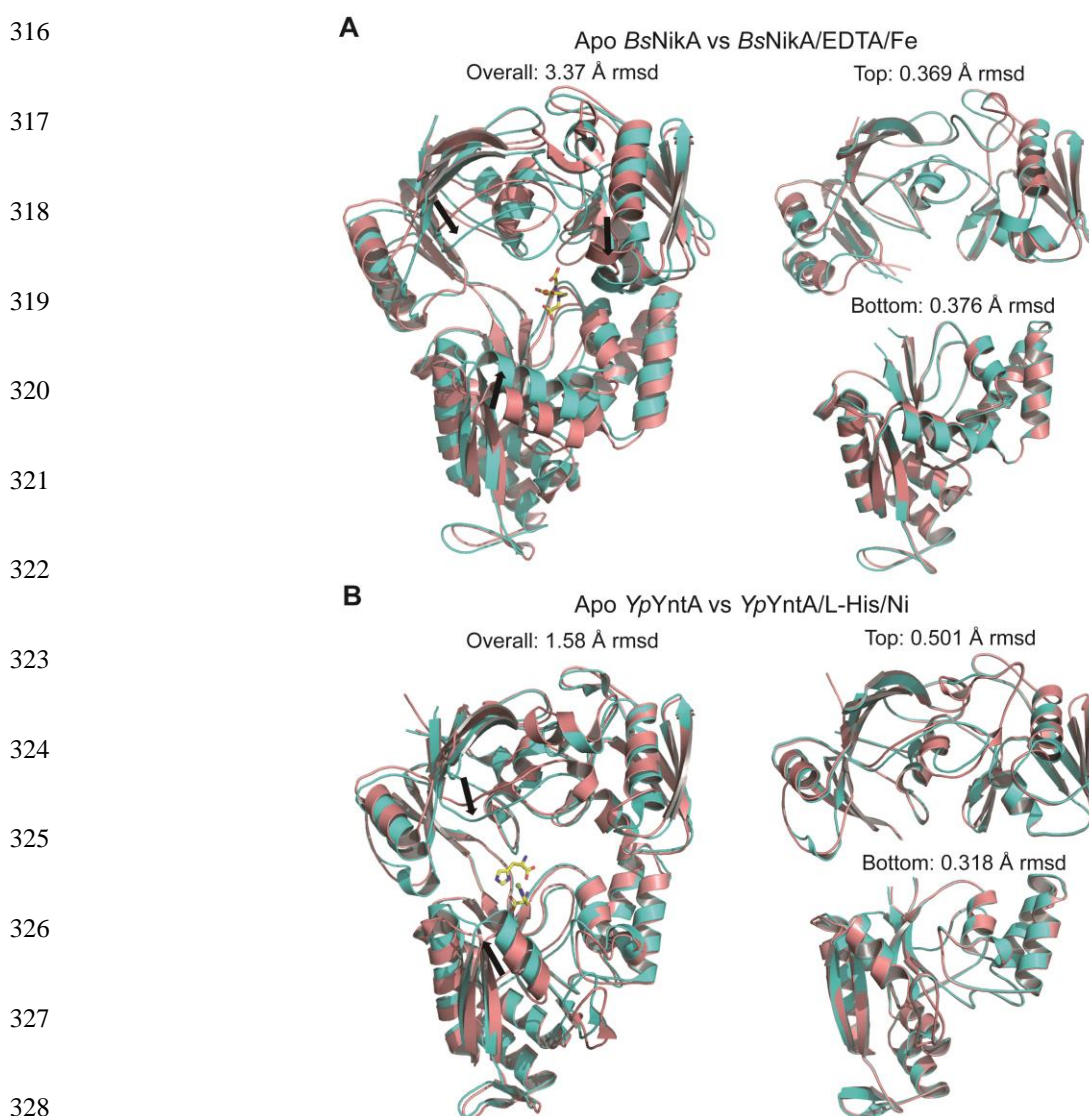

329

330 **Fig. S11.** Ligand binding induces inter-domain conformational change in oligopeptide-  
331 transportation SBPs. (A) Structural comparison between the apo structure of *Lactococcus lactis*  
332 OppA (PDB: 3FTO) and the *L/OppA/SLSQLSSQS* complex (PDB: 3RYA). The apo and the  
333 complex structures are colored salmon and cyan, respectively. (B) Structural comparison  
334 between the apo structure of *Salmonella typhimurium* OppA (PDB: 1RKM) and the *StOppA/KK*  
335 complex (PDB: 2RKM). The apo and the complex structures are colored salmon and cyan,  
336 respectively. The black arrows represent the directions that each domain moves.

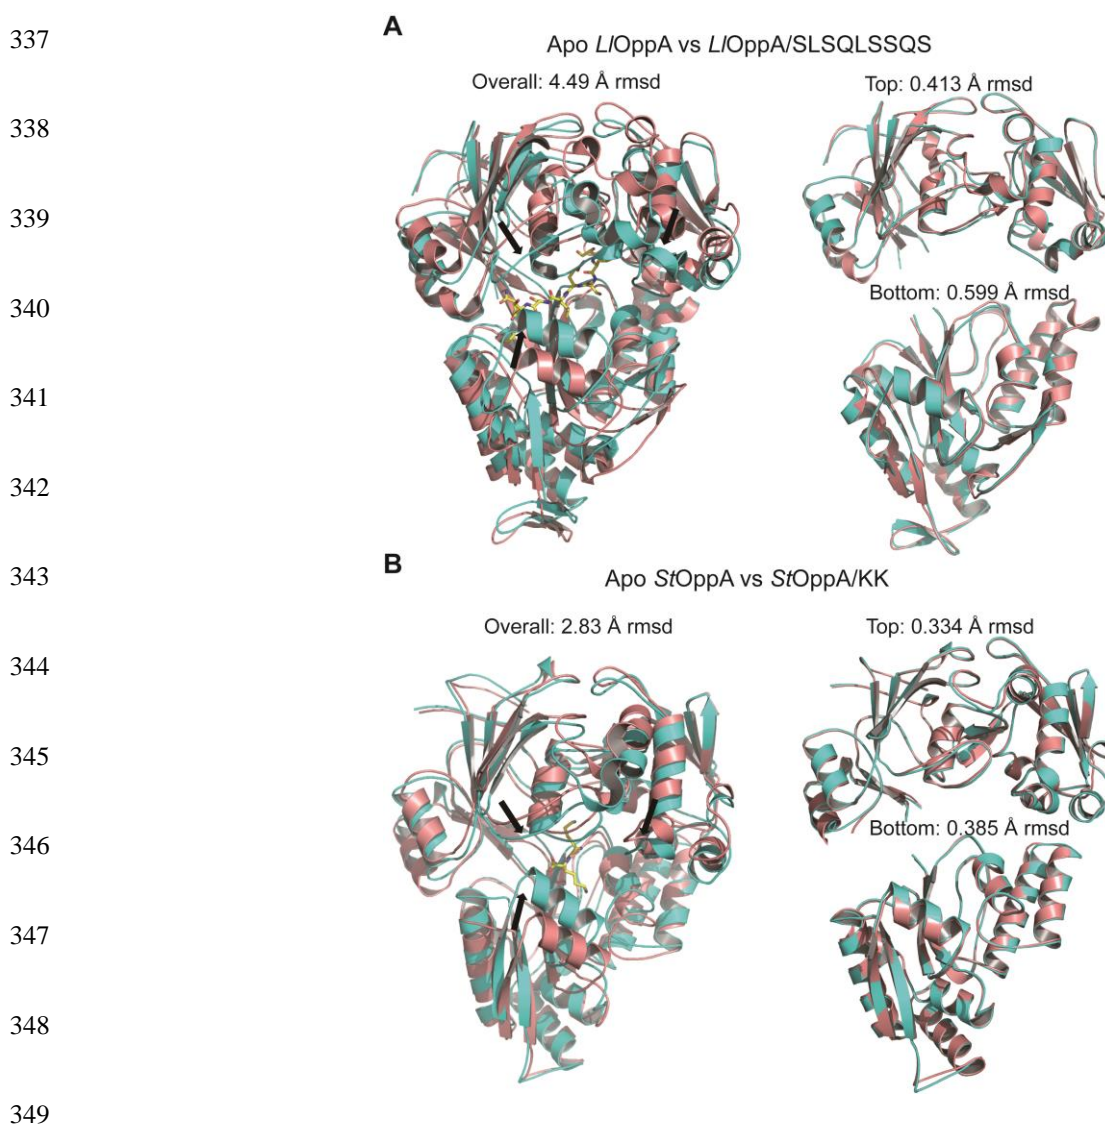

350 **Fig. S12.** Cd<sup>2+</sup> binding induces inter-domain conformational change in *Streptococcus*  
351 *pneumoniae* PsaA. The apo (PDB: 3ZK7) and complex (PDB: 4UTP) structures are colored  
352 salmon and cyan, respectively.

### Apo *SpPsaA* vs *SpPsaA/Cd*

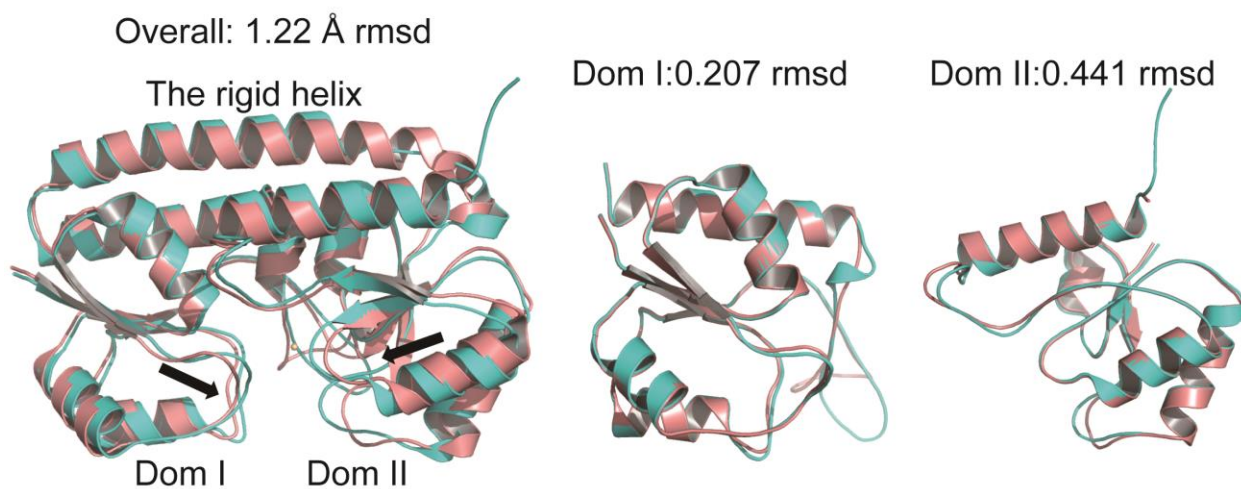

353

354

355

356

357

358

359

360

361

362

363

364 **Fig. S13.** CntA possesses a unique ligand-recognition mode. (A) Superimposition of the structure  
365 of CntA/StP/Co<sup>2+</sup> with that of *Sa*NikA/L-histidine/Ni<sup>2+</sup>. CntA and *Sa*NikA are colored gray and  
366 cyan, respectively. StP and L-histidine are colored yellow and orange, respectively. The ligand-  
367 recognition residues are indicated. (B) Structural comparison between the CntA/StP/Co<sup>2+</sup>  
368 complex and the *Bs*NikA/EDTA/Fe<sup>3+</sup> complex. CntA and *Bs*NikA are colored gray and green,  
369 respectively. The ligand-recognition residues are indicated.

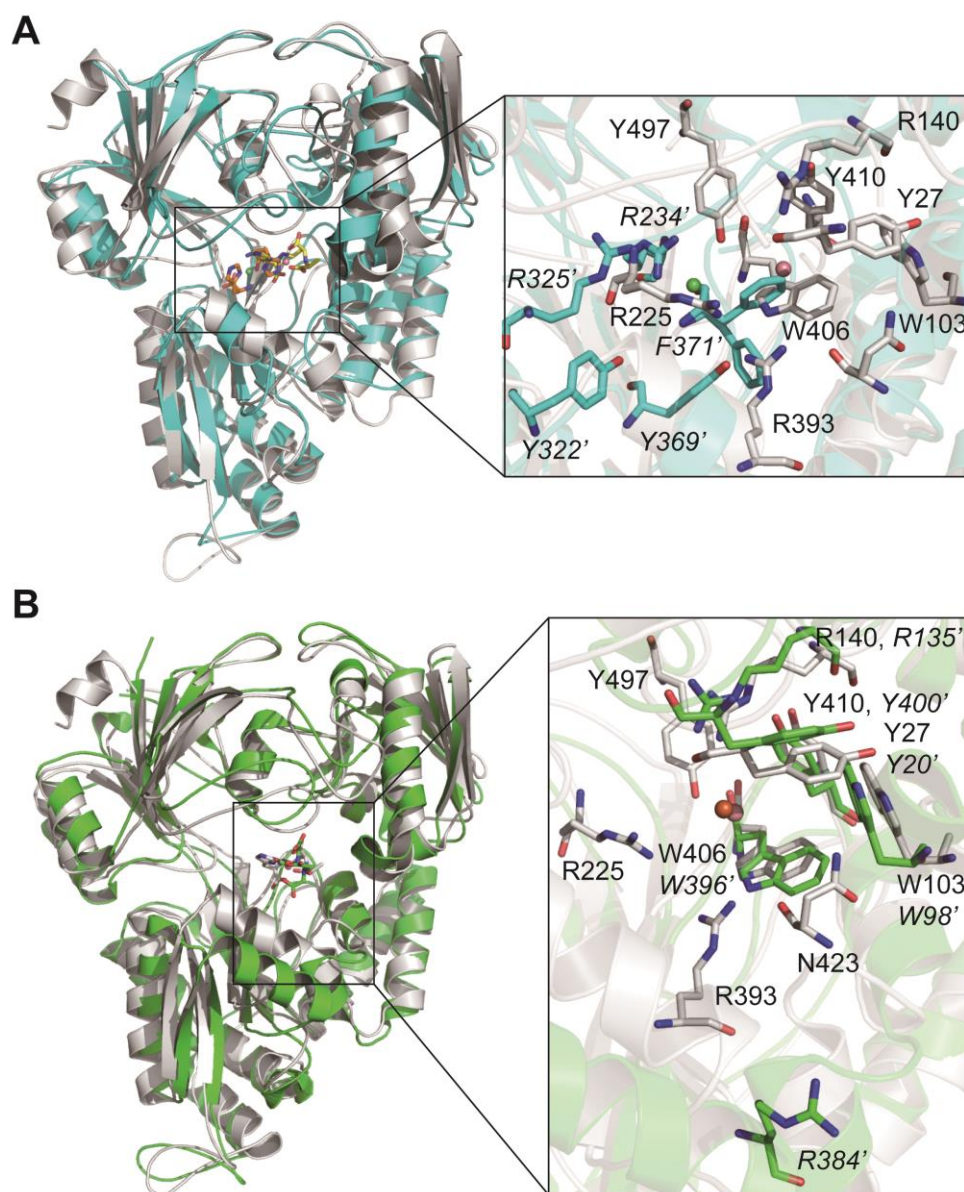

370

371 **Fig. S14.** Single amino-acid mutations of the StP-binding residues do not affect protein  
372 expression or stability. (A) Size-exclusion chromatography analysis of the wild-type and mutant  
373 proteins of CntA. The proteins were analyzed in the HiLoad 16/600 Superdex 200 pg column  
374 (GE Healthcare). (B) SDS-PAGE analysis of the wild-type and mutant proteins.

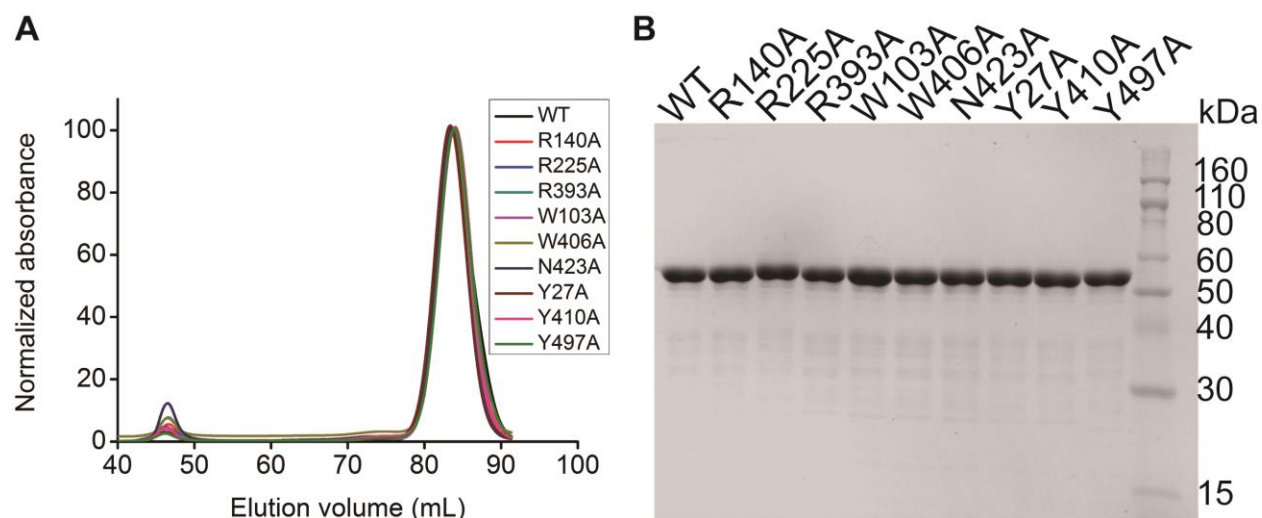

375  
376  
377  
378  
379  
380  
381  
382  
383  
384  
385

386 **Fig. S15.** ITC assays for the binding between StP/Co<sup>2+</sup> and mutant CntA proteins.  $K_d$ : the  
 387 dissociation constant; N: the number of binding sites per CntA.

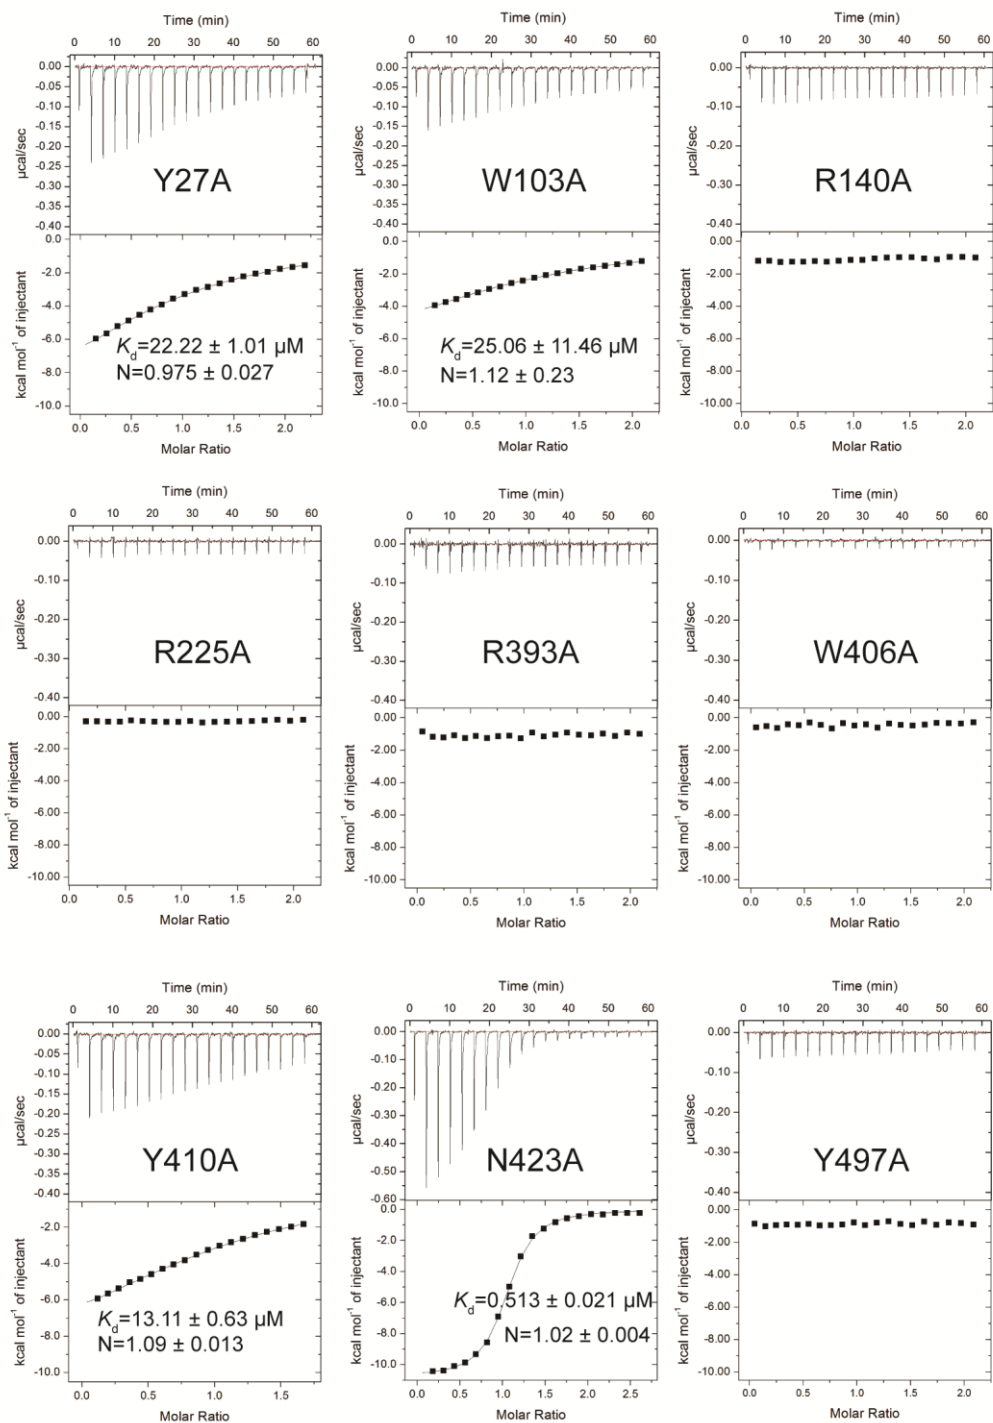

TOT



405 **Fig. S16.** Scheme of the strategy for single-base substitution mutations in the *S. aureus* genome  
406 by using the CRISPR/Cas9 system pCasSA. If the desired mutation site is not present in an  
407 adjacent protospacer adjacent motif (PAM), a silent mutation will be introduced in the PAM to  
408 prevent the cutting of Cas9/sgRNA complex in the genome of edited cells.

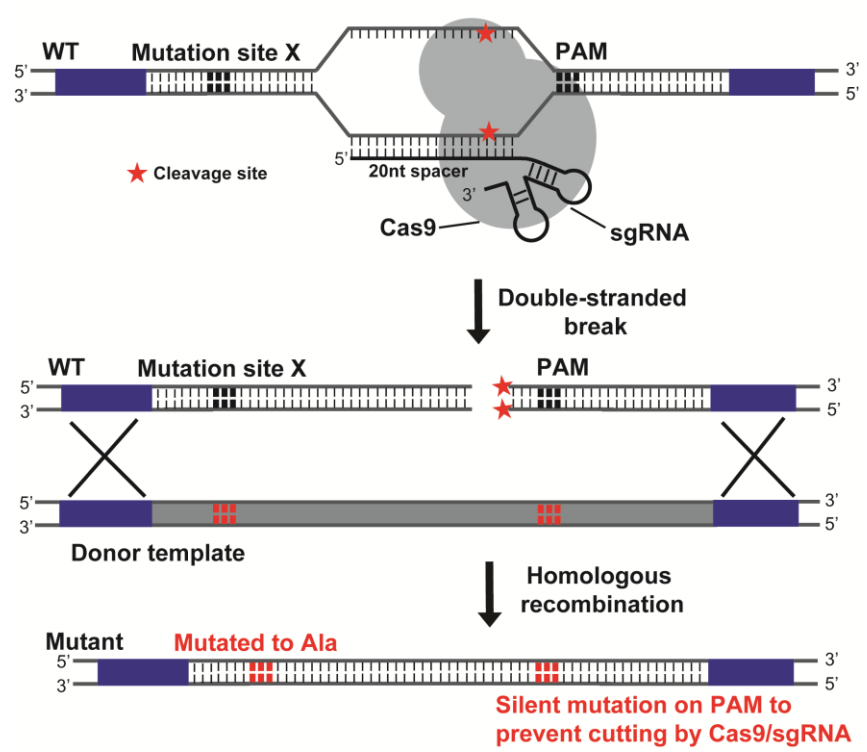

409  
410  
411  
412  
413  
414  
415

416 **Fig. S17.** Growth curve measurements of the Newman mutant and complementation strains in  
 417 the presence or absence of 1.5 mM  $\text{Co}^{2+}$ . The assays were performed in the chemically defined  
 418 medium. Dashed lines: strains were cultured in the absence of 1.5 mM  $\text{Co}^{2+}$ . Solid lines: strains  
 419 were cultured in the presence of 1.5 mM  $\text{Co}^{2+}$ . Dot lines: complementation strains were cultured  
 420 in the presence of 1.5 mM  $\text{Co}^{2+}$ .

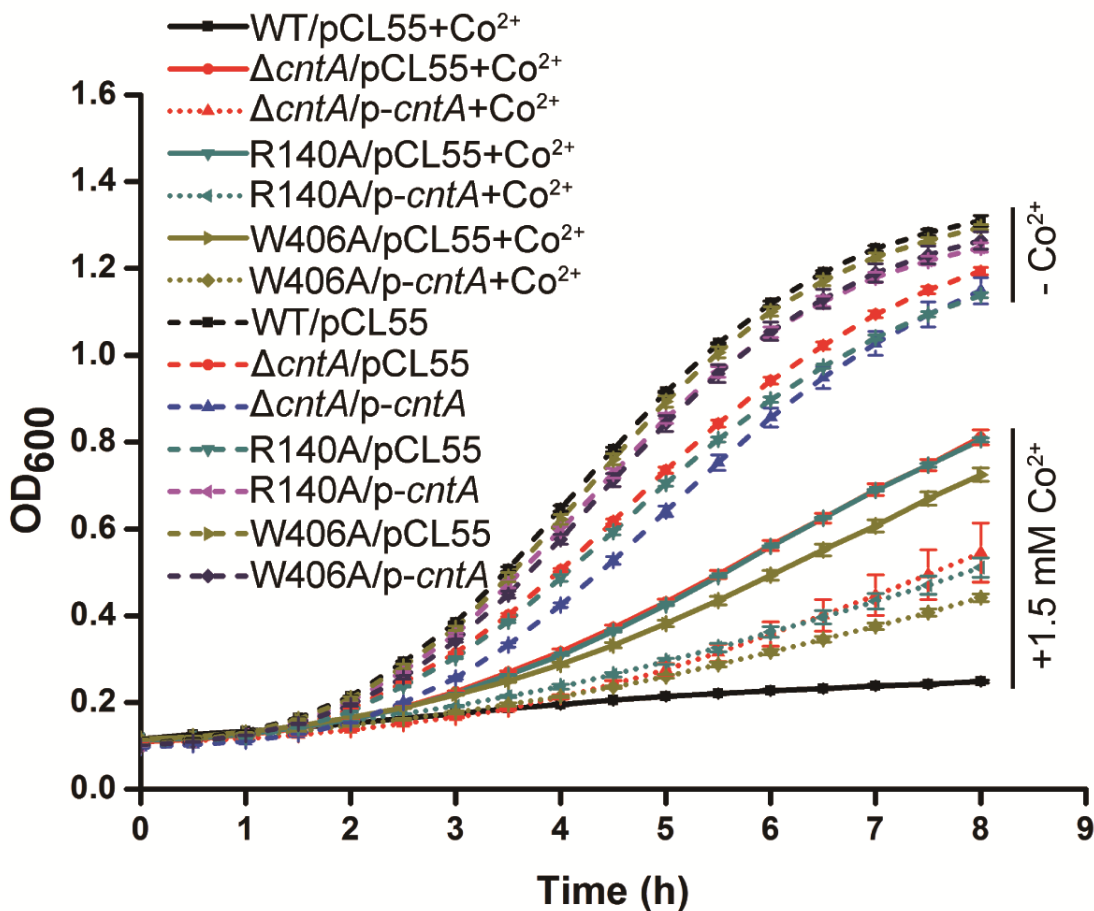

432

433

434

435

436 **Fig. S18.**  $\text{Co}^{2+}$  accumulation measurements of various strains (Newman) by ICP-AES. (A)  $\text{Co}^{2+}$   
 437 accumulation measurements of various mutant strains by ICP-AES. (B)  $\text{Co}^{2+}$  accumulation  
 438 measurements of various complementation strains by ICP-AES. The assays were performed in  
 439 CDM the presence of  $1 \mu\text{M Co}^{2+}$ . \*: The  $\text{Co}^{2+}$  amount is below the detection limit of ICP-AES at  
 440 7900 atoms/CFU. The  $P$  values are calculated from Student  $t$  test.

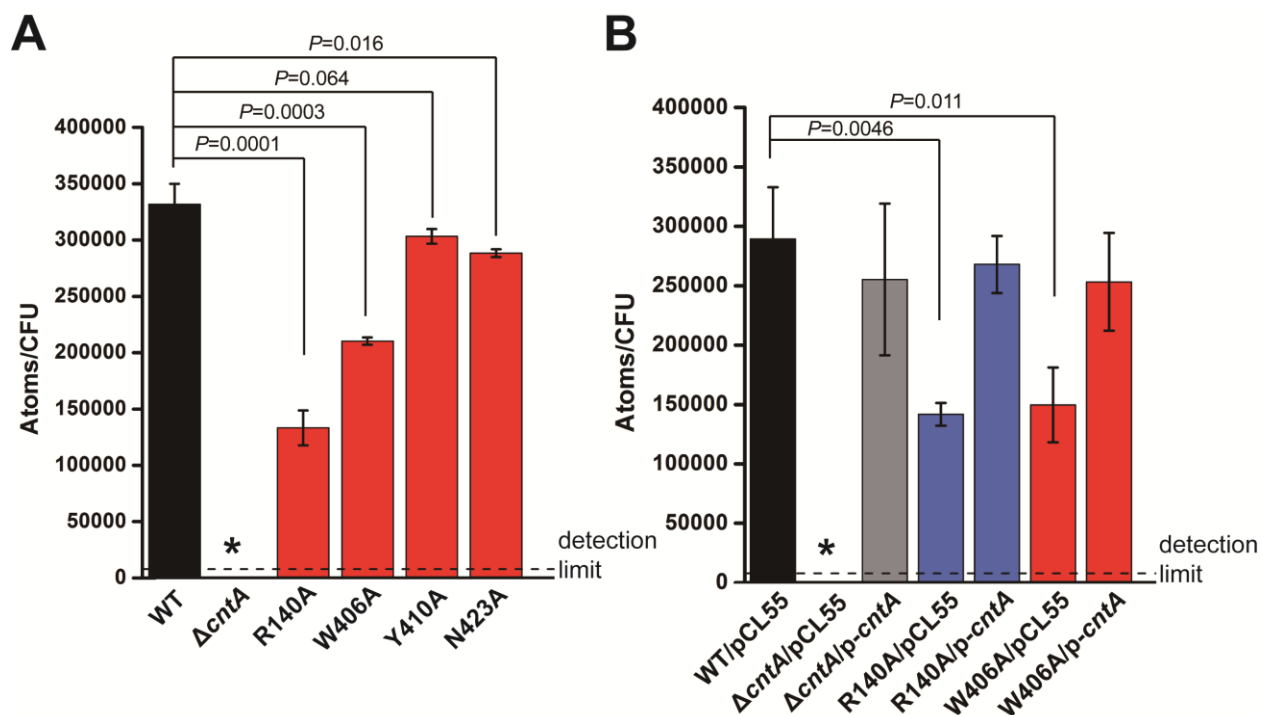

441  
 442  
 443  
 444  
 445  
 446  
 447  
 448

449 **Fig. S19.** Sequence alignment of CntA homologous proteins from the StP-like synthesis loci in  
 450 different bacteria. The StP/metal-recognition residues of CntA are indicated.

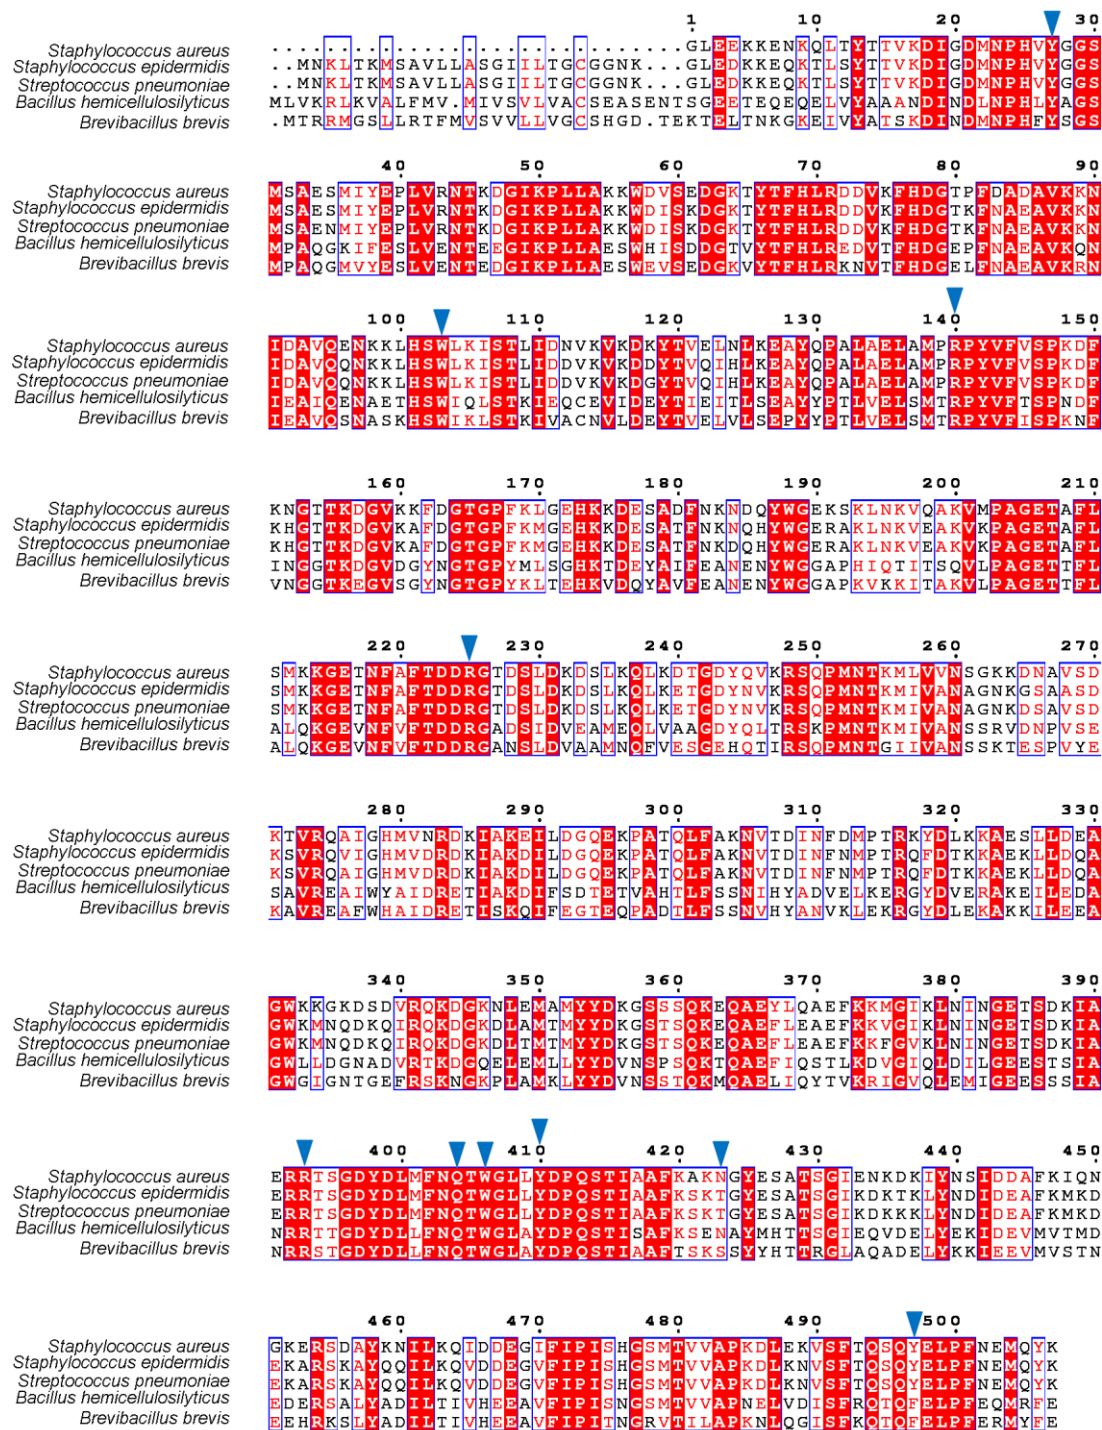

451

452

453 **Table S2.** Direct and water-mediated interactions between CntA and StP/metal complexes.

|             |                                  | StP/Co <sup>2+</sup>             | StP/Zn <sup>2+</sup>             | StP/Ni <sup>2+</sup> |
|-------------|----------------------------------|----------------------------------|----------------------------------|----------------------|
| Atom of StP | AA interacted                    | Distance (Å)                     | Distance (Å)                     | Distance (Å)         |
| O (1a)      | R393                             | 3.1                              | 3.0                              | 3.0                  |
| O (1b)      | R393                             | 3.0                              | 3.0                              | 2.8                  |
| O (1b)      | Q404                             | 2.9/2.7*                         | 2.6/2.7*                         | 2.6/2.7*             |
| O (1b)      | Y497                             | 2.9/2.7/2.6*                     | 2.6/2.7/2.7*                     | 2.6/2.8/2.5*         |
| O (9b)      | N423                             | 3.1                              | 3.1                              | 3.0                  |
| N (14)      | R225                             | 3.4                              | 3.2                              | 3.4                  |
| O (16a)     | R140                             | 2.8                              | 2.7                              | 2.8                  |
| O (16b)     | R140                             | 2.9                              | 3.1                              | 3.1                  |
| O (16b)     | Y410                             | 2.9/3.0*                         | 2.7/2.6*                         | 2.7/2.7*             |
| C (4)       | W406                             | 3.5                              | 3.4                              | 3.3                  |
| C (5)       | Y410                             | 3.9                              | 3.9                              | 3.9                  |
| C (10)      | Y497                             | 3.6                              | 3.7                              | 3.7                  |
| C (17)      | Y27                              | 3.6                              | 3.7                              | 3.8                  |
| C (17)      | W103                             | 3.4                              | 3.5                              | 3.4                  |
| Atom of StP | Distance to Co <sup>2+</sup> (Å) | Distance to Zn <sup>2+</sup> (Å) | Distance to Ni <sup>2+</sup> (Å) |                      |
| O (1a)      | 1.8                              | 2.2                              | 2.0                              |                      |
| N (3)       | 2.2                              | 2.4                              | 2.3                              |                      |
| N (7)       | 2.5                              | 2.3                              | 2.1                              |                      |
| O (9a)      | 1.8                              | 2.0                              | 2.0                              |                      |
| N (12)      | 2.0                              | 2.0                              | 2.1                              |                      |
| O (16a)     | 1.9                              | 2.2                              | 2.0                              |                      |

454 \*Water-mediated hydrogen bonding.

455 The interactions listed in gray background represent hydrogen bonding. The interactions listed in blue background  
456 represent van der Waals interactions. The interactions listed in brown background represent coordination bonding.

457

458

459

460

461

462

463

464

465 **Table S3.** Strains and plasmids used in this study.

| Plasmids or strains                  | Description                                                                                                           | Reference  |
|--------------------------------------|-----------------------------------------------------------------------------------------------------------------------|------------|
| <b>Plasmids</b>                      |                                                                                                                       |            |
| pET28a_HRV3C_CntA                    | pET28a_HRV3C derivative, for expressing CntA, Km <sup>r</sup>                                                         | This study |
| pET28a_HRV3C_Y27A                    | pET28a_HRV3C_CntA derivative, for expressing the CntA_Y27A mutant protein                                             | This study |
| pET28a_HRV3C_W103A                   | pET28a_HRV3C_CntA derivative, for expressing the CntA_W103A mutant protein                                            | This study |
| pET28a_HRV3C_R140A                   | pET28a_HRV3C_CntA derivative, for expressing the CntA_R140A mutant protein                                            | This study |
| pET28a_HRV3C_R225A                   | pET28a_HRV3C_CntA derivative, for expressing the CntA_R225A mutant protein                                            | This study |
| pET28a_HRV3C_R393A                   | pET28a_HRV3C_CntA derivative, for expressing the CntA_R393A mutant protein                                            | This study |
| pET28a_HRV3C_W406A                   | pET28a_HRV3C_CntA derivative, for expressing the CntA_W406A mutant protein                                            | This study |
| pET28a_HRV3C_Y410A                   | pET28a_HRV3C_CntA derivative, for expressing the CntA_Y410A mutant protein                                            | This study |
| pET28a_HRV3C_N423A                   | pET28a_HRV3C_CntA derivative, for expressing the CntA_N423A mutant protein                                            | This study |
| pET28a_HRV3C_Y497A                   | pET28a_HRV3C_CntA derivative, for expressing the CntA_Y497A mutant protein                                            | This study |
| pSP_cnt                              | pSP72 derivative, for the construction of repair templates                                                            | This study |
| pCasSA                               | <i>S.aureus</i> genome editing vector, Km <sup>r</sup> , Cm <sup>r</sup>                                              | (6)        |
| pCasSA_W103A                         | pCasSA derivative, for mutation of W103A in <i>cntA</i>                                                               | This study |
| pCasSA_R140A                         | pCasSA derivative, for mutation of R140A in <i>cntA</i>                                                               | This study |
| pCasSA_W406A                         | pCasSA derivative, for mutation of W406A in <i>cntA</i>                                                               | This study |
| pCasSA_Y410A                         | pCasSA derivative, for mutation of Y410A in <i>cntA</i>                                                               | This study |
| pCasSA_N423A                         | pCasSA derivative, for mutation of N423A in <i>cntA</i>                                                               | This study |
| pCasSA_cntA                          | pCasSA derivative, for <i>cntA</i> deletion                                                                           | (6)        |
| pCL55                                | Single-copy integration plasmid, Cm <sup>r</sup> , Ap <sup>r</sup>                                                    | (7)        |
| pCL55_CntA                           | pCL55 derivative, for <i>cntA</i> complementation                                                                     | This study |
| <b>Strains</b>                       |                                                                                                                       |            |
| <i>E.coli</i>                        |                                                                                                                       |            |
| DH10B                                | F- <i>endA1 recA1 galU galK deoR nupG rpsL ΔlacX74 Φ80lacZΔM15 araD139 Δ(ara,leu)7697 mcrA Δ(mrr-hsdRMS-mcrBC) λ-</i> | Lab stock  |
| ALC7885                              | <i>E. coli</i> K12, $\Delta$ <i>dcm</i> mutant with pACYC184 containing hsdMS-2 <sup>CC8</sup> , Cm <sup>r</sup>      | (8)        |
| <i>S. aureus</i>                     |                                                                                                                       |            |
| RN4220                               | Restriction-deficient transformation recipient                                                                        | Lab stock  |
| RN4220_W103A                         | <i>cntA</i> W103A mutation in RN4220                                                                                  | This study |
| RN4220_R140A                         | <i>cntA</i> R140A mutation in RN4220                                                                                  | This study |
| RN4220_W406A                         | <i>cntA</i> W406A mutation in RN4220                                                                                  | This study |
| RN4220_Y410A                         | <i>cntA</i> Y410A mutation in RN4220                                                                                  | This study |
| RN4220_N423A                         | <i>cntA</i> N423A mutation in RN4220                                                                                  | This study |
| RN4220_Δ <i>cntA</i>                 | <i>cntA</i> gene deletion in RN4220                                                                                   | (6)        |
| Newman                               | Wild type                                                                                                             | (11)       |
| Newman_R140A                         | <i>cntA</i> R140A mutation in Newman                                                                                  | This study |
| Newman_W406A                         | <i>cntA</i> W406A mutation in Newman                                                                                  | This study |
| Newman_Y410A                         | <i>cntA</i> Y410A mutation in Newman                                                                                  | This study |
| Newman_N423A                         | <i>cntA</i> N423A mutation in Newman                                                                                  | This study |
| Newman_Δ <i>cntA</i>                 | <i>cntA</i> gene deletion in Newman                                                                                   | (6)        |
| Newman/pCL55                         | Newman with empty pCL55                                                                                               | This study |
| Newman_Δ <i>cntA</i> /pCL55          | Newman $\Delta$ <i>cntA</i> mutation with empty pCL55                                                                 | This study |
| Newman_Δ <i>cntA</i> /p- <i>cntA</i> | Newman $\Delta$ <i>cntA</i> mutation with pCL55_ <i>cntA</i> complementation                                          | This study |
| Newman_R140A/pCL55                   | Newman <i>cntA</i> R140A mutation with empty pCL55                                                                    | This study |
| Newman_R140A/p- <i>cntA</i>          | Newman <i>cntA</i> R140A mutation with pCL55_ <i>cntA</i> complementation                                             | This study |
| Newman_W406A/pCL55                   | Newman <i>cntA</i> W406A mutation with empty pCL55                                                                    | This study |
| Newman_W406A/p- <i>cntA</i>          | Newman <i>cntA</i> W406A mutation with pCL55_ <i>cntA</i> complementation                                             | This study |

466 Ap<sup>r</sup>, ampicillin resistant; Km<sup>r</sup>, kanamycin resistant; Cm<sup>r</sup>, chloramphenicol resistant.

467 **Table S4.** Primers used in this study.

|                                  | Name         | Sequence (5'-3')                                             | Description                                                                             |
|----------------------------------|--------------|--------------------------------------------------------------|-----------------------------------------------------------------------------------------|
| CntA protein                     | CntA-Fw      | cttgaagtcctcttcaggaccatggttagaggagaaaaaa<br>gaaaacaagc       | amplification of <i>cntA</i> locus from the genomic DNA for expressing the CntA protein |
|                                  | CntA-Rv      | atctcagtggtggtggtgctcgagtattatactgatttcatt<br>gaatggt        |                                                                                         |
|                                  | CntA-Y27A-1  | acattgatccaccggcaacatgctgattcatatcaccgatatc                  | for Y27A mutation in CntA                                                               |
|                                  | CntA-Y27A-2  | gatatcgggtgatatgaatccgatgtgccgggtgataaatg                    |                                                                                         |
|                                  | CntA-W103A-1 | cattgtcaattaatgctgaaatcttaacgcagaatgcaattttgtttc<br>ttgaactg | for W103A mutation in CntA                                                              |
|                                  | CntA-W103A-2 | cagttcaagaaaaaataatgcttctgctgtaagattcgacatt<br>aattgacaatg   |                                                                                         |
|                                  | CntA-R140A-1 | acacaaatacatatggagcaggcatcgtaattcagccaatg                    | for R140A mutation in CntA                                                              |
|                                  | CntA-R140A-2 | acacaaatacatatggagcaggcatcgtaattcagccaatg                    |                                                                                         |
|                                  | CntA-R225A-1 | aagctatctgtacctgcatcatctgtgaaggcaaatgctttca                  | for R225A mutation in CntA                                                              |
|                                  | CntA-R225A-2 | tgaaacgaactttgcttcacagatgatgcaggtagacagatagctt               |                                                                                         |
|                                  | CntA-R393A-1 | cattaagtcataatcaccagaagtagcacgctcagcaattttatctgat<br>gtt     | for R393A mutation in CntA                                                              |
|                                  | CntA-R393A-2 | aacatcagataaaattgctgaacgtgctacttctggtgattatgacttaa<br>tg     |                                                                                         |
|                                  | CntA-W406A-1 | ggatcgtacaataatcccgcagtttggtgacattaagtcataatcac              | for W406A mutation in CntA                                                              |
|                                  | CntA-W406A-2 | gtgattatgacttaattgtcaacaaactgcgggattattgtacgatcc             |                                                                                         |
|                                  | CntA-Y410A-1 | gcaatagtagtcttggatcggccaataatcccaagtttggtg                   | for Y410A mutation in CntA                                                              |
|                                  | CntA-Y410A-2 | caaccaaactggggattattggccgatccacaaagtactattgc                 |                                                                                         |
|                                  | CntA-N423A-1 | ttgcacttcataaccagcttctgcttaaatgctgcaatagtagtcttg<br>g        | for N423A mutation in CntA                                                              |
|                                  | CntA-N423A-2 | ccacaaagtactattgagcatttaaacggaagctggtatgaaagt<br>gcaa        |                                                                                         |
|                                  | CntA-Y497A-1 | gaaaaagatcattcacacaatcacaggctgaattaccattcaatgaa<br>atgcagta  | for Y497A mutation in CntA                                                              |
|                                  | CntA-Y497A-2 | tactgcatttcattgaatgtaattcagcctgtgattgtggaatgact<br>ttttc     |                                                                                         |
| <i>cntA</i> gene deletion        | cntA-sp-Fw   | GAAACaagcaaaagtaatgcctgc                                     | spacer for <i>cntA</i> gene deletion                                                    |
|                                  | cntA-sp-Rv   | AAACGcaggcattacttttgcttg                                     |                                                                                         |
|                                  | cntA-UpFw    | TTTGAGATCTGTCCATACCCATGGTCTAG<br>Aacatggatcgacacattca        | amplification of ~1kb <i>cntA</i> upstream for gene deletion                            |
|                                  | cntA-UpRv    | ttctcaatgcctgatgttgcTTGCTTTTCCTCTTTCTAA<br>ATTGATAAGTTG      |                                                                                         |
|                                  | cntA-DnFw    | CAACTTATCAATTTAGAAAAGAGGAAAAGC<br>AAGcaacatcaggcattgagaa     | amplification of ~1kb <i>cntA</i> downstream for gene deletion                          |
|                                  | cntA-DnRv    | AAGATACAGGTATATTTTCTGACTCGAGc<br>tagtccaggccatgcaaaag        |                                                                                         |
|                                  | cntAsqFw     | GCCAGGCGTACAAGGATATG                                         | sequencing of <i>cntA</i> locus                                                         |
| <i>cntA</i> gene complementation | CntA-pCL1    | ccttctcttcaagaattctaagggttgaagtttataatagaaaa                 | amplification of <i>cnt</i> operon promoter from the genomic DNA                        |
|                                  | CntA-pCL2    | atatgctttaattcacttcattattatactgatttcattgaatgg                |                                                                                         |
|                                  | CntA-pCL3    | cattcaatgaaatgcagtataaataatgaagtgaattaaagcatattaa<br>gttaa   | amplification of <i>cntA</i> gene from the genomic DNA                                  |
|                                  | CntA-pCL4    | ttttacatccctccGGATCCagaatgtttcatgcttagca                     |                                                                                         |
| <i>cntA</i> gene mutation        | cntI         | attcgagctcggtagccgggatccTCTAGAaagtcgttgaatc<br>gccactg       | amplification of ~4kb <i>cntA</i> gene and up and down regions for                      |

|            |                                                             |                                                                 |                                                                      |
|------------|-------------------------------------------------------------|-----------------------------------------------------------------|----------------------------------------------------------------------|
|            | cnt2                                                        | atacgatttagtgacactatagaaCTCGAGatgtcacaagtgg<br>tgctgct          | gene mutation                                                        |
| W103A      | CntA-F68F-1                                                 | ttaacgtcatctctcaaatgaaacgtgatgtcttccatc                         | for <i>cntA</i> _F68F silent mutation                                |
|            | CntA-F68F-2                                                 | gatgggaagacatacacggttcatttgagagatgacgttaa                       |                                                                      |
|            | F68-sp-Fw                                                   | GAAAatttaacgtcatctctcaaa                                        | spacer for <i>cntA</i> _W103A mutation                               |
|            | F68-sp-Rv                                                   | AAACtttgagagatgacgttaaat                                        |                                                                      |
|            | W103A-UpFw                                                  | TTTGAGATCTGTCCATACCCATGGTCTAG<br><u>Aaggaccgataacgatgacacta</u> | amplification of ~2 kb repair for <i>cntA</i> _W103A mutation        |
| W103A-DnRv | AAGATACAGGTATATTTTTCTGACTCGAGa<br>gtttggtgaacattaagtcataatc |                                                                 |                                                                      |
| R140A      | CntA-F209F-1                                                | cgttcacctttttcattgataaaaatgctgttcaccagcaggcatt                  | for <i>cntA</i> _F209F silent mutation                               |
|            | CntA-F209F-2                                                | aatgctgctggtgaaacagcattttatcaatgaaaaaggtaaag                    |                                                                      |
|            | F209-sp-Fw                                                  | GAAAatcacctttttcattgat                                          | spacer for <i>cntA</i> _R140A mutation                               |
|            | F209-sp-Rv                                                  | AAACatcaatgaaaaaggtaaag                                         |                                                                      |
|            | R140A-UpFw                                                  | TTTGAGATCTGTCCATACCCATGGTCTAG<br><u>Aaggaccgataacgatgacacta</u> | amplification of ~2 kb repair for <i>cntA</i> _R140A mutation        |
| R140A-DnRv | AAGATACAGGTATATTTTTCTGACTCGAGa<br>gtttggtgaacattaagtcataatc |                                                                 |                                                                      |
| W406A      | W406-sp-Fw                                                  | GAAAacttaattgtcaaccaact                                         | spacer for <i>cntA</i> _W406A mutation                               |
|            | W406-sp-Rv                                                  | AAACagtttggtgaacattaagt                                         |                                                                      |
|            | W406A-UpFw                                                  | TTTGAGATCTGTCCATACCCATGGTCTAG<br><u>A_gcgtggatcaatgtctgctg</u>  | amplification of ~2 kb repair for <i>cntA</i> _W406A mutation        |
|            | W406A-DnRv                                                  | AAGATACAGGTATATTTTTCTGACTCGAG<br>atgcacaagtggctgctgct           |                                                                      |
| Y410A      | CntA-I448I-1                                                | caacagcattgatgacgcatttaaaatacaaaacgftaaagagc                    | for <i>cntA</i> _I448I silent mutation                               |
|            | CntA-I448I-2                                                | gctctttaccgtttgtattttaaatgcgtcatcaatgctgttg                     |                                                                      |
|            | I448-sp-Fw                                                  | GAAActgaacgctctttaccgttt                                        | spacer for <i>cntA</i> _Y410A, N423A mutation                        |
|            | I448-sp-Rv                                                  | AAACaaacggtaaagagcgttcag                                        |                                                                      |
|            | Y410A-UpFw                                                  | TTTGAGATCTGTCCATACCCATGGTCTAG<br><u>A_cggtggatcaatgtctgctg</u>  | amplification of ~2 kb repair for <i>cntA</i> _Y410A, N423A mutation |
|            | Y410A-DnRv                                                  | AAGATACAGGTATATTTTTCTGACTCGAG<br>atgcacaagtggctgctgct           |                                                                      |

468

469

470

471

472

473

474

475



476 **REFERENCES**

- 477 1. Minor W, Cymborowski M, Otwinowski Z, & Chruszcz M (2006) HKL-3000: the  
478 integration of data reduction and structure solution--from diffraction images to an initial  
479 model in minutes. *Acta Crystallogr D Biol Crystallogr* 62(Pt 8):859-866.
- 480 2. Read RJ (2001) Pushing the boundaries of molecular replacement with maximum  
481 likelihood. *Acta Crystallogr D Biol Crystallogr* 57(Pt 10):1373-1382.
- 482 3. Collaborative Computational Project N (1994) The CCP4 suite: programs for protein  
483 crystallography. *Acta Crystallogr D Biol Crystallogr* 50(Pt 5):760-763.
- 484 4. Adams PD, *et al.* (2010) PHENIX: a comprehensive Python-based system for  
485 macromolecular structure solution. *Acta Crystallogr D Biol Crystallogr* 66(Pt 2):213-221.
- 486 5. Emsley P & Cowtan K (2004) Coot: model-building tools for molecular graphics. *Acta*  
487 *Crystallogr D Biol Crystallogr* 60(Pt 12 Pt 1):2126-2132.
- 488 6. Chen W, Zhang Y, Yeo WS, Bae T, & Ji Q (2017) Rapid and Efficient Genome Editing  
489 in *Staphylococcus aureus* by Using an Engineered CRISPR/Cas9 System. *J Am Chem*  
490 *Soc* 139(10):3790-3795.
- 491 7. Lee CY, Buranen SL, & Ye ZH (1991) Construction of single-copy integration vectors  
492 for *Staphylococcus aureus*. *Gene* 103(1):101-105.
- 493 8. Jones MJ, Donegan NP, Mikheyeva IV, & Cheung AL (2015) Improving transformation  
494 of *Staphylococcus aureus* belonging to the CC1, CC5 and CC8 clonal complexes. *PLoS*  
495 *One* 10(3):e0119487.
- 496 9. Remy L, *et al.* (2013) The *Staphylococcus aureus* Opp1 ABC transporter imports nickel  
497 and cobalt in zinc-depleted conditions and contributes to virulence. *Mol Microbiol*  
498 87(4):730-743.
- 499 10. Ghssein G, *et al.* (2016) Biosynthesis of a broad-spectrum nicotianamine-like  
500 metallophore in *Staphylococcus aureus*. *Science* 352(6289):1105-1109.
- 501 11. Duthie ES, Lorenz LL (1952) Staphylococcal coagulase: mode of action and antigenicity.  
502 *J Gen Microbiol* 6:95-107.

503

504

505
